# Supplementary material
Source: ML conference proceedings conference paper supplement (https://proceedings.neurips.cc/paper_files/paper/2022/hash/64ad7b36b497f375ded2e6f15713ed4c-Abstract.html)
Supplement: Supplementary file 1 [file 64ad7b36b497f375ded2e6f15713ed4c-Supplemental-Conference.zip]

Archive with 154 entries (133 files):
- supplementary/
- supplementary/.DS_Store
- __MACOSX/supplementary/._.DS_Store
- supplementary/code/
- __MACOSX/supplementary/._code
- supplementary/overview.mp4
- __MACOSX/supplementary/._overview.mp4
- supplementary/appendix.pdf
- __MACOSX/supplementary/._appendix.pdf
- supplementary/task-discovery-viz/
- supplementary/outline.pdf
- __MACOSX/supplementary/._outline.pdf
- supplementary/supmat_taskviz/
- __MACOSX/supplementary/._supmat_taskviz
- supplementary/code/check_as.py
- __MACOSX/supplementary/code/._check_as.py
- supplementary/code/visualization/
- __MACOSX/supplementary/code/._visualization
- supplementary/code/LICENSE
- __MACOSX/supplementary/code/._LICENSE
- supplementary/code/requirements.txt
- __MACOSX/supplementary/code/._requirements.txt
- supplementary/code/train-as-uniformity.py
- __MACOSX/supplementary/code/._train-as-uniformity.py
- supplementary/code/train-2net.py
- __MACOSX/supplementary/code/._train-2net.py
- supplementary/code/models/
- __MACOSX/supplementary/code/._models
- supplementary/code/datautils.py
- __MACOSX/supplementary/code/._datautils.py
- supplementary/code/README.md
- __MACOSX/supplementary/code/._README.md
- supplementary/code/adversarial_splits/
- __MACOSX/supplementary/code/._adversarial_splits
- supplementary/code/.gitignore
- __MACOSX/supplementary/code/._.gitignore
- supplementary/code/utils.py
- __MACOSX/supplementary/code/._utils.py
- supplementary/code/configs/
- __MACOSX/supplementary/code/._configs
- supplementary/code/tiny_imagenet.py
- __MACOSX/supplementary/code/._tiny_imagenet.py
- supplementary/code/assets/
- __MACOSX/supplementary/code/._assets
- supplementary/task-discovery-viz/unregulated/
- supplementary/task-discovery-viz/ssl-regulated/
- supplementary/supmat_taskviz/unregulated_top16_d32.jpg
- __MACOSX/supplementary/supmat_taskviz/._unregulated_top16_d32.jpg
- supplementary/supmat_taskviz/regulated_ssl_top16.pdf
- __MACOSX/supplementary/supmat_taskviz/._regulated_ssl_top16.pdf
- supplementary/supmat_taskviz/unregulated_top16_d8.pdf
- __MACOSX/supplementary/supmat_taskviz/._unregulated_top16_d8.pdf
- supplementary/supmat_taskviz/unregulated_top16_d128.jpg
- __MACOSX/supplementary/supmat_taskviz/._unregulated_top16_d128.jpg
- supplementary/supmat_taskviz/unregulated_top16_d64.jpg
- __MACOSX/supplementary/supmat_taskviz/._unregulated_top16_d64.jpg
- supplementary/code/visualization/adversarial_splits_visualization.ipynb
- __MACOSX/supplementary/code/visualization/._adversarial_splits_visualization.ipynb
- supplementary/code/visualization/task_visualization.ipynb
- __MACOSX/supplementary/code/visualization/._task_visualization.ipynb
- supplementary/code/models/td_encoder.py
- __MACOSX/supplementary/code/models/._td_encoder.py
- supplementary/code/models/tasks.py
- __MACOSX/supplementary/code/models/._tasks.py
- supplementary/code/models/__init__.py
- __MACOSX/supplementary/code/models/.___init__.py
- supplementary/code/models/as_uniformity.py
- __MACOSX/supplementary/code/models/._as_uniformity.py
- supplementary/code/models/taskness_score.py
- __MACOSX/supplementary/code/models/._taskness_score.py
- supplementary/code/models/vit.py
- __MACOSX/supplementary/code/models/._vit.py
- supplementary/code/models/resnet.py
- __MACOSX/supplementary/code/models/._resnet.py
- supplementary/code/models/supervised.py
- __MACOSX/supplementary/code/models/._supervised.py
- supplementary/code/models/agreement_score.py
- __MACOSX/supplementary/code/models/._agreement_score.py
- supplementary/code/models/fcnet.py
- __MACOSX/supplementary/code/models/._fcnet.py
- supplementary/code/adversarial_splits/imagenet/
- __MACOSX/supplementary/code/adversarial_splits/._imagenet
- supplementary/code/adversarial_splits/cifar10/
- __MACOSX/supplementary/code/adversarial_splits/._cifar10
- supplementary/code/configs/as-uniformity-encoder/
- __MACOSX/supplementary/code/configs/._as-uniformity-encoder
- supplementary/code/configs/as-eval/
- __MACOSX/supplementary/code/configs/._as-eval
- supplementary/code/assets/tasks/
- __MACOSX/supplementary/code/assets/._tasks
- supplementary/code/assets/adversarial_splits/
- __MACOSX/supplementary/code/assets/._adversarial_splits
- supplementary/code/assets/figures/
- __MACOSX/supplementary/code/assets/._figures
- supplementary/task-discovery-viz/unregulated/task_idx=2.mp4
- supplementary/task-discovery-viz/unregulated/task_idx=3.mp4
- supplementary/task-discovery-viz/unregulated/task_idx=1.mp4
- supplementary/task-discovery-viz/unregulated/task_idx=0.mp4
- supplementary/task-discovery-viz/unregulated/task_idx=4.mp4
- supplementary/task-discovery-viz/unregulated/task_idx=5.mp4
- supplementary/task-discovery-viz/unregulated/task_idx=7.mp4
- supplementary/task-discovery-viz/unregulated/task_idx=6.mp4
- supplementary/task-discovery-viz/ssl-regulated/task_idx=2.mp4
- supplementary/task-discovery-viz/ssl-regulated/task_idx=3.mp4
- supplementary/task-discovery-viz/ssl-regulated/task_idx=1.mp4
- supplementary/task-discovery-viz/ssl-regulated/task_idx=0.mp4
- supplementary/code/adversarial_splits/imagenet/train.py
- __MACOSX/supplementary/code/adversarial_splits/imagenet/._train.py
- supplementary/code/adversarial_splits/imagenet/random_net_adv_split.py
- __MACOSX/supplementary/code/adversarial_splits/imagenet/._random_net_adv_split.py
- supplementary/code/adversarial_splits/cifar10/train.py
- __MACOSX/supplementary/code/adversarial_splits/cifar10/._train.py
- supplementary/code/configs/as-uniformity-encoder/as-uniformity-xas.yaml
- __MACOSX/supplementary/code/configs/as-uniformity-encoder/._as-uniformity-xas.yaml
- supplementary/code/configs/as-uniformity-encoder/as-uniformity-train-loss-proxy.yaml
- __MACOSX/supplementary/code/configs/as-uniformity-encoder/._as-uniformity-train-loss-proxy.yaml
- supplementary/code/configs/as-uniformity-encoder/as-uniformity-default.yaml
- __MACOSX/supplementary/code/configs/as-uniformity-encoder/._as-uniformity-default.yaml
- supplementary/code/configs/as-eval/as-proxy-params.yaml
- __MACOSX/supplementary/code/configs/as-eval/._as-proxy-params.yaml
- supplementary/code/configs/as-eval/as-eval-default.yaml
- __MACOSX/supplementary/code/configs/as-eval/._as-eval-default.yaml
- supplementary/code/configs/as-eval/as-eval-xas-task.yaml
- __MACOSX/supplementary/code/configs/as-eval/._as-eval-xas-task.yaml
- supplementary/code/assets/tasks/tiny_imagenet_binary_tasks.npy
- __MACOSX/supplementary/code/assets/tasks/._tiny_imagenet_binary_tasks.npy
- supplementary/code/assets/tasks/discovered.csv
- __MACOSX/supplementary/code/assets/tasks/._discovered.csv
- supplementary/code/assets/tasks/agreement_table.csv
- __MACOSX/supplementary/code/assets/tasks/._agreement_table.csv
- supplementary/code/assets/tasks/ssl_tasks.csv
- __MACOSX/supplementary/code/assets/tasks/._ssl_tasks.csv
- supplementary/code/assets/adversarial_splits/celeba/
- __MACOSX/supplementary/code/assets/adversarial_splits/._celeba
- supplementary/code/assets/adversarial_splits/imagenet/
- __MACOSX/supplementary/code/assets/adversarial_splits/._imagenet
- supplementary/code/assets/adversarial_splits/cifar10/
- __MACOSX/supplementary/code/assets/adversarial_splits/._cifar10
- supplementary/code/assets/figures/adversarial-split.png
- __MACOSX/supplementary/code/assets/figures/._adversarial-split.png
- supplementary/code/assets/figures/pull-figure.png
- __MACOSX/supplementary/code/assets/figures/._pull-figure.png
- supplementary/code/assets/figures/task_viz.png
- __MACOSX/supplementary/code/assets/figures/._task_viz.png
- supplementary/code/assets/figures/adv_split_viz.png
- __MACOSX/supplementary/code/assets/figures/._adv_split_viz.png
- supplementary/code/assets/adversarial_splits/celeba/list_eval_partition_adv_split.csv
- __MACOSX/supplementary/code/assets/adversarial_splits/celeba/._list_eval_partition_adv_split.csv
- supplementary/code/assets/adversarial_splits/celeba/list_eval_partition_random_split.csv
- __MACOSX/supplementary/code/assets/adversarial_splits/celeba/._list_eval_partition_random_split.csv
- supplementary/code/assets/adversarial_splits/imagenet/adv-split.torch
- __MACOSX/supplementary/code/assets/adversarial_splits/imagenet/._adv-split.torch
- supplementary/code/assets/adversarial_splits/cifar10/cifar_splits.torch
- __MACOSX/supplementary/code/assets/adversarial_splits/cifar10/._cifar_splits.torch
