# Supplementary material
Source: ML conference proceedings conference paper supplement (https://proceedings.neurips.cc/paper_files/paper/2022/hash/64ad7b36b497f375ded2e6f15713ed4c-Abstract.html)
Supplement: Supplementary file 1 [file 64ad7b36b497f375ded2e6f15713ed4c-Supplemental-Conference.zip › supplementary/code/assets/adversarial_splits/celeba/list_eval_partition_adv_split.csv]

image_id	partition
000001.jpg	1
000002.jpg	0
000003.jpg	0
000004.jpg	1
000005.jpg	0
000006.jpg	1
000007.jpg	1
000008.jpg	1
000009.jpg	1
000010.jpg	0
000011.jpg	0
000012.jpg	0
000013.jpg	1
000014.jpg	0
000015.jpg	0
000016.jpg	1
000017.jpg	0
000018.jpg	1
000019.jpg	1
000020.jpg	1
000021.jpg	0
000022.jpg	1
000023.jpg	0
000024.jpg	0
000025.jpg	0
000026.jpg	0
000027.jpg	1
000028.jpg	0
000029.jpg	0
000030.jpg	1
000031.jpg	0
000032.jpg	0
000033.jpg	0
000034.jpg	0
000035.jpg	0
000036.jpg	0
000037.jpg	0
000038.jpg	1
000039.jpg	1
000040.jpg	0
000041.jpg	0
000042.jpg	0
000043.jpg	1
000044.jpg	1
000045.jpg	1
000046.jpg	1
000047.jpg	1
000048.jpg	1
000049.jpg	0
000050.jpg	1
000051.jpg	1
000052.jpg	1
000053.jpg	0
000054.jpg	1
000055.jpg	1
000056.jpg	1
000057.jpg	1
000058.jpg	1
000059.jpg	1
000060.jpg	1
000061.jpg	1
000062.jpg	0
000063.jpg	0
000064.jpg	0
000065.jpg	0
000066.jpg	0
000067.jpg	1
000068.jpg	0
000069.jpg	0
000070.jpg	0
000071.jpg	1
000072.jpg	0
000073.jpg	1
000074.jpg	1
000075.jpg	0
000076.jpg	1
000077.jpg	1
000078.jpg	0
000079.jpg	0
000080.jpg	1
000081.jpg	1
000082.jpg	1
000083.jpg	0
000084.jpg	0
000085.jpg	1
000086.jpg	1
000087.jpg	1
000088.jpg	1
000089.jpg	0
000090.jpg	1
000091.jpg	1
000092.jpg	1
000093.jpg	0
000094.jpg	1
000095.jpg	0
000096.jpg	1
000097.jpg	1
000098.jpg	1
000099.jpg	0
000100.jpg	1
000101.jpg	0
000102.jpg	0
000103.jpg	0
000104.jpg	0
000105.jpg	1
000106.jpg	1
000107.jpg	0
000108.jpg	1
000109.jpg	0
000110.jpg	1
000111.jpg	1
000112.jpg	1
000113.jpg	1
000114.jpg	1
000115.jpg	1
000116.jpg	0
000117.jpg	1
000118.jpg	1
000119.jpg	1
000120.jpg	1
000121.jpg	0
000122.jpg	1
000123.jpg	1
000124.jpg	0
000125.jpg	0
000126.jpg	1
000127.jpg	0
000128.jpg	1
000129.jpg	1
000130.jpg	0
000131.jpg	0
000132.jpg	1
000133.jpg	1
000134.jpg	0
000135.jpg	1
000136.jpg	0
000137.jpg	0
000138.jpg	1
000139.jpg	0
000140.jpg	1
000141.jpg	1
000142.jpg	0
000143.jpg	0
000144.jpg	0
000145.jpg	1
000146.jpg	0
000147.jpg	0
000148.jpg	0
000149.jpg	0
000150.jpg	1
000151.jpg	1
000152.jpg	0
000153.jpg	1
000154.jpg	1
000155.jpg	1
000156.jpg	1
000157.jpg	1
000158.jpg	1
000159.jpg	1
000160.jpg	0
000161.jpg	0
000162.jpg	1
000163.jpg	1
000164.jpg	0
000165.jpg	1
000166.jpg	0
000167.jpg	1
000168.jpg	0
000169.jpg	1
000170.jpg	1
000171.jpg	0
000172.jpg	1
000173.jpg	0
000174.jpg	1
000175.jpg	1
000176.jpg	0
000177.jpg	1
000178.jpg	1
000179.jpg	1
000180.jpg	1
000181.jpg	1
000182.jpg	0
000183.jpg	0
000184.jpg	1
000185.jpg	1
000186.jpg	0
000187.jpg	0
000188.jpg	0
000189.jpg	1
000190.jpg	0
000191.jpg	1
000192.jpg	0
000193.jpg	1
000194.jpg	0
000195.jpg	0
000196.jpg	1
000197.jpg	1
000198.jpg	1
000199.jpg	1
000200.jpg	0
000201.jpg	0
000202.jpg	0
000203.jpg	0
000204.jpg	1
000205.jpg	1
000206.jpg	1
000207.jpg	0
000208.jpg	1
000209.jpg	0
000210.jpg	1
000211.jpg	0
000212.jpg	0
000213.jpg	0
000214.jpg	1
000215.jpg	0
000216.jpg	0
000217.jpg	1
000218.jpg	0
000219.jpg	0
000220.jpg	1
000221.jpg	0
000222.jpg	0
000223.jpg	1
000224.jpg	1
000225.jpg	1
000226.jpg	1
000227.jpg	0
000228.jpg	0
000229.jpg	0
000230.jpg	1
000231.jpg	1
000232.jpg	1
000233.jpg	0
000234.jpg	1
000235.jpg	1
000236.jpg	1
000237.jpg	0
000238.jpg	0
000239.jpg	1
000240.jpg	0
000241.jpg	0
000242.jpg	1
000243.jpg	0
000244.jpg	0
000245.jpg	1
000246.jpg	1
000247.jpg	1
000248.jpg	0
000249.jpg	1
000250.jpg	0
000251.jpg	0
000252.jpg	0
000253.jpg	0
000254.jpg	1
000255.jpg	0
000256.jpg	1
000257.jpg	1
000258.jpg	1
000259.jpg	0
000260.jpg	1
000261.jpg	0
000262.jpg	1
000263.jpg	1
000264.jpg	0
000265.jpg	0
000266.jpg	1
000267.jpg	1
000268.jpg	1
000269.jpg	1
000270.jpg	1
000271.jpg	1
000272.jpg	1
000273.jpg	0
000274.jpg	1
000275.jpg	0
000276.jpg	1
000277.jpg	1
000278.jpg	1
000279.jpg	0
000280.jpg	0
000281.jpg	1
000282.jpg	1
000283.jpg	0
000284.jpg	0
000285.jpg	1
000286.jpg	1
000287.jpg	1
000288.jpg	0
000289.jpg	1
000290.jpg	0
000291.jpg	1
000292.jpg	1
000293.jpg	0
000294.jpg	1
000295.jpg	0
000296.jpg	1
000297.jpg	1
000298.jpg	0
000299.jpg	0
000300.jpg	1
000301.jpg	1
000302.jpg	1
000303.jpg	1
000304.jpg	0
000305.jpg	0
000306.jpg	0
000307.jpg	0
000308.jpg	0
000309.jpg	1
000310.jpg	0
000311.jpg	1
000312.jpg	1
000313.jpg	0
000314.jpg	1
000315.jpg	1
000316.jpg	0
000317.jpg	0
000318.jpg	0
000319.jpg	1
000320.jpg	0
000321.jpg	0
000322.jpg	1
000323.jpg	0
000324.jpg	0
000325.jpg	1
000326.jpg	1
000327.jpg	1
000328.jpg	1
000329.jpg	1
000330.jpg	1
000331.jpg	0
000332.jpg	1
000333.jpg	0
000334.jpg	0
000335.jpg	1
000336.jpg	1
000337.jpg	0
000338.jpg	1
000339.jpg	0
000340.jpg	1
000341.jpg	0
000342.jpg	1
000343.jpg	1
000344.jpg	0
000345.jpg	1
000346.jpg	1
000347.jpg	1
000348.jpg	0
000349.jpg	1
000350.jpg	1
000351.jpg	0
000352.jpg	1
000353.jpg	1
000354.jpg	0
000355.jpg	0
000356.jpg	1
000357.jpg	0
000358.jpg	0
000359.jpg	1
000360.jpg	1
000361.jpg	0
000362.jpg	0
000363.jpg	1
000364.jpg	0
000365.jpg	1
000366.jpg	1
000367.jpg	0
000368.jpg	1
000369.jpg	1
000370.jpg	1
000371.jpg	1
000372.jpg	1
000373.jpg	1
000374.jpg	0
000375.jpg	1
000376.jpg	0
000377.jpg	1
000378.jpg	0
000379.jpg	1
000380.jpg	1
000381.jpg	1
000382.jpg	1
000383.jpg	1
000384.jpg	1
000385.jpg	0
000386.jpg	0
000387.jpg	0
000388.jpg	0
000389.jpg	0
000390.jpg	1
000391.jpg	0
000392.jpg	1
000393.jpg	0
000394.jpg	1
000395.jpg	1
000396.jpg	1
000397.jpg	1
000398.jpg	1
000399.jpg	1
000400.jpg	1
000401.jpg	1
000402.jpg	1
000403.jpg	1
000404.jpg	0
000405.jpg	0
000406.jpg	1
000407.jpg	0
000408.jpg	0
000409.jpg	0
000410.jpg	1
000411.jpg	0
000412.jpg	1
000413.jpg	1
000414.jpg	1
000415.jpg	1
000416.jpg	0
000417.jpg	0
000418.jpg	1
000419.jpg	0
000420.jpg	1
000421.jpg	1
000422.jpg	1
000423.jpg	0
000424.jpg	0
000425.jpg	0
000426.jpg	1
000427.jpg	1
000428.jpg	0
000429.jpg	0
000430.jpg	0
000431.jpg	1
000432.jpg	1
000433.jpg	1
000434.jpg	1
000435.jpg	1
000436.jpg	1
000437.jpg	0
000438.jpg	0
000439.jpg	0
000440.jpg	1
000441.jpg	0
000442.jpg	1
000443.jpg	1
000444.jpg	0
000445.jpg	1
000446.jpg	0
000447.jpg	0
000448.jpg	0
000449.jpg	0
000450.jpg	0
000451.jpg	1
000452.jpg	0
000453.jpg	1
000454.jpg	1
000455.jpg	1
000456.jpg	1
000457.jpg	0
000458.jpg	1
000459.jpg	0
000460.jpg	1
000461.jpg	1
000462.jpg	1
000463.jpg	0
000464.jpg	1
000465.jpg	1
000466.jpg	0
000467.jpg	0
000468.jpg	0
000469.jpg	0
000470.jpg	0
000471.jpg	0
000472.jpg	1
000473.jpg	1
000474.jpg	0
000475.jpg	0
000476.jpg	0
000477.jpg	1
000478.jpg	0
000479.jpg	0
000480.jpg	1
000481.jpg	0
000482.jpg	1
000483.jpg	1
000484.jpg	1
000485.jpg	1
000486.jpg	0
000487.jpg	1
000488.jpg	0
000489.jpg	1
000490.jpg	0
000491.jpg	1
000492.jpg	1
000493.jpg	0
000494.jpg	1
000495.jpg	0
000496.jpg	1
000497.jpg	0
000498.jpg	0
000499.jpg	1
000500.jpg	1
000501.jpg	1
000502.jpg	1
000503.jpg	0
000504.jpg	1
000505.jpg	0
000506.jpg	1
000507.jpg	0
000508.jpg	1
000509.jpg	0
000510.jpg	0
000511.jpg	1
000512.jpg	1
000513.jpg	0
000514.jpg	1
000515.jpg	0
000516.jpg	0
000517.jpg	0
000518.jpg	0
000519.jpg	0
000520.jpg	1
000521.jpg	1
000522.jpg	1
000523.jpg	1
000524.jpg	1
000525.jpg	0
000526.jpg	1
000527.jpg	1
000528.jpg	1
000529.jpg	0
000530.jpg	1
000531.jpg	0
000532.jpg	0
000533.jpg	0
000534.jpg	0
000535.jpg	1
000536.jpg	1
000537.jpg	1
000538.jpg	0
000539.jpg	1
000540.jpg	1
000541.jpg	1
000542.jpg	0
000543.jpg	0
000544.jpg	1
000545.jpg	1
000546.jpg	1
000547.jpg	1
000548.jpg	1
000549.jpg	1
000550.jpg	1
000551.jpg	1
000552.jpg	0
000553.jpg	0
000554.jpg	0
000555.jpg	1
000556.jpg	0
000557.jpg	0
000558.jpg	1
000559.jpg	0
000560.jpg	1
000561.jpg	1
000562.jpg	1
000563.jpg	1
000564.jpg	1
000565.jpg	1
000566.jpg	1
000567.jpg	0
000568.jpg	0
000569.jpg	0
000570.jpg	1
000571.jpg	0
000572.jpg	1
000573.jpg	0
000574.jpg	1
000575.jpg	0
000576.jpg	0
000577.jpg	1
000578.jpg	1
000579.jpg	1
000580.jpg	1
000581.jpg	0
000582.jpg	1
000583.jpg	0
000584.jpg	1
000585.jpg	0
000586.jpg	0
000587.jpg	0
000588.jpg	0
000589.jpg	1
000590.jpg	0
000591.jpg	1
000592.jpg	0
000593.jpg	1
000594.jpg	1
000595.jpg	0
000596.jpg	1
000597.jpg	0
000598.jpg	1
000599.jpg	1
000600.jpg	1
000601.jpg	1
000602.jpg	1
000603.jpg	1
000604.jpg	1
000605.jpg	1
000606.jpg	0
000607.jpg	1
000608.jpg	1
000609.jpg	1
000610.jpg	1
000611.jpg	1
000612.jpg	1
000613.jpg	0
000614.jpg	1
000615.jpg	1
000616.jpg	1
000617.jpg	1
000618.jpg	0
000619.jpg	1
000620.jpg	0
000621.jpg	0
000622.jpg	0
000623.jpg	1
000624.jpg	0
000625.jpg	1
000626.jpg	1
000627.jpg	1
000628.jpg	1
000629.jpg	0
000630.jpg	0
000631.jpg	1
000632.jpg	0
000633.jpg	1
000634.jpg	0
000635.jpg	1
000636.jpg	1
000637.jpg	1
000638.jpg	0
000639.jpg	0
000640.jpg	1
000641.jpg	0
000642.jpg	1
000643.jpg	0
000644.jpg	0
000645.jpg	0
000646.jpg	1
000647.jpg	1
000648.jpg	0
000649.jpg	0
000650.jpg	0
000651.jpg	0
000652.jpg	1
000653.jpg	0
000654.jpg	0
000655.jpg	0
000656.jpg	1
000657.jpg	0
000658.jpg	0
000659.jpg	0
000660.jpg	0
000661.jpg	0
000662.jpg	0
000663.jpg	0
000664.jpg	1
000665.jpg	1
000666.jpg	0
000667.jpg	0
000668.jpg	1
000669.jpg	1
000670.jpg	1
000671.jpg	0
000672.jpg	1
000673.jpg	0
000674.jpg	1
000675.jpg	1
000676.jpg	0
000677.jpg	1
000678.jpg	0
000679.jpg	1
000680.jpg	0
000681.jpg	0
000682.jpg	1
000683.jpg	0
000684.jpg	0
000685.jpg	0
000686.jpg	1
000687.jpg	0
000688.jpg	0
000689.jpg	1
000690.jpg	0
000691.jpg	1
000692.jpg	0
000693.jpg	1
000694.jpg	1
000695.jpg	0
000696.jpg	1
000697.jpg	0
000698.jpg	1
000699.jpg	1
000700.jpg	1
000701.jpg	1
000702.jpg	0
000703.jpg	0
000704.jpg	0
000705.jpg	1
000706.jpg	1
000707.jpg	0
000708.jpg	1
000709.jpg	1
000710.jpg	1
000711.jpg	0
000712.jpg	1
000713.jpg	1
000714.jpg	1
000715.jpg	1
000716.jpg	1
000717.jpg	0
000718.jpg	1
000719.jpg	0
000720.jpg	1
000721.jpg	1
000722.jpg	1
000723.jpg	0
000724.jpg	0
000725.jpg	1
000726.jpg	1
000727.jpg	1
000728.jpg	0
000729.jpg	1
000730.jpg	1
000731.jpg	0
000732.jpg	0
000733.jpg	0
000734.jpg	1
000735.jpg	1
000736.jpg	1
000737.jpg	1
000738.jpg	1
000739.jpg	0
000740.jpg	1
000741.jpg	1
000742.jpg	0
000743.jpg	0
000744.jpg	1
000745.jpg	0
000746.jpg	1
000747.jpg	0
000748.jpg	0
000749.jpg	1
000750.jpg	1
000751.jpg	1
000752.jpg	1
000753.jpg	0
000754.jpg	0
000755.jpg	1
000756.jpg	1
000757.jpg	1
000758.jpg	1
000759.jpg	1
000760.jpg	1
000761.jpg	0
000762.jpg	0
000763.jpg	1
000764.jpg	0
000765.jpg	0
000766.jpg	1
000767.jpg	0
000768.jpg	0
000769.jpg	1
000770.jpg	1
000771.jpg	0
000772.jpg	1
000773.jpg	1
000774.jpg	1
000775.jpg	1
000776.jpg	0
000777.jpg	0
000778.jpg	0
000779.jpg	1
000780.jpg	1
000781.jpg	0
000782.jpg	0
000783.jpg	0
000784.jpg	1
000785.jpg	1
000786.jpg	0
000787.jpg	0
000788.jpg	1
000789.jpg	1
000790.jpg	0
000791.jpg	1
000792.jpg	1
000793.jpg	1
000794.jpg	1
000795.jpg	0
000796.jpg	0
000797.jpg	0
000798.jpg	1
000799.jpg	0
000800.jpg	1
000801.jpg	0
000802.jpg	0
000803.jpg	0
000804.jpg	0
000805.jpg	1
000806.jpg	0
000807.jpg	1
000808.jpg	0
000809.jpg	1
000810.jpg	0
000811.jpg	0
000812.jpg	1
000813.jpg	0
000814.jpg	1
000815.jpg	1
000816.jpg	0
000817.jpg	0
000818.jpg	1
000819.jpg	1
000820.jpg	0
000821.jpg	0
000822.jpg	1
000823.jpg	0
000824.jpg	1
000825.jpg	1
000826.jpg	0
000827.jpg	0
000828.jpg	0
000829.jpg	0
000830.jpg	1
000831.jpg	1
000832.jpg	1
000833.jpg	1
000834.jpg	1
000835.jpg	0
000836.jpg	0
000837.jpg	1
000838.jpg	0
000839.jpg	1
000840.jpg	1
000841.jpg	1
000842.jpg	1
000843.jpg	1
000844.jpg	1
000845.jpg	0
000846.jpg	0
000847.jpg	1
000848.jpg	0
000849.jpg	1
000850.jpg	0
000851.jpg	1
000852.jpg	1
000853.jpg	1
000854.jpg	1
000855.jpg	1
000856.jpg	1
000857.jpg	1
000858.jpg	1
000859.jpg	0
000860.jpg	1
000861.jpg	0
000862.jpg	1
000863.jpg	1
000864.jpg	0
000865.jpg	0
000866.jpg	1
000867.jpg	1
000868.jpg	1
000869.jpg	1
000870.jpg	1
000871.jpg	0
000872.jpg	0
000873.jpg	1
000874.jpg	1
000875.jpg	1
000876.jpg	0
000877.jpg	1
000878.jpg	1
000879.jpg	0
000880.jpg	0
000881.jpg	1
000882.jpg	1
000883.jpg	1
000884.jpg	1
000885.jpg	1
000886.jpg	0
000887.jpg	0
000888.jpg	0
000889.jpg	1
000890.jpg	0
000891.jpg	0
000892.jpg	1
000893.jpg	1
000894.jpg	1
000895.jpg	1
000896.jpg	1
000897.jpg	0
000898.jpg	0
000899.jpg	1
000900.jpg	0
000901.jpg	1
000902.jpg	0
000903.jpg	0
000904.jpg	1
000905.jpg	1
000906.jpg	1
000907.jpg	0
000908.jpg	1
000909.jpg	0
000910.jpg	0
000911.jpg	1
000912.jpg	0
000913.jpg	0
000914.jpg	1
000915.jpg	0
000916.jpg	0
000917.jpg	1
000918.jpg	1
000919.jpg	0
000920.jpg	1
000921.jpg	0
000922.jpg	1
000923.jpg	0
000924.jpg	0
000925.jpg	0
000926.jpg	1
000927.jpg	1
000928.jpg	0
000929.jpg	0
000930.jpg	1
000931.jpg	0
000932.jpg	1
000933.jpg	0
000934.jpg	1
000935.jpg	1
000936.jpg	1
000937.jpg	1
000938.jpg	1
000939.jpg	1
000940.jpg	0
000941.jpg	1
000942.jpg	1
000943.jpg	0
000944.jpg	0
000945.jpg	1
000946.jpg	1
000947.jpg	1
000948.jpg	1
000949.jpg	0
000950.jpg	0
000951.jpg	1
000952.jpg	0
000953.jpg	0
000954.jpg	1
000955.jpg	1
000956.jpg	0
000957.jpg	1
000958.jpg	0
000959.jpg	1
000960.jpg	0
000961.jpg	1
000962.jpg	1
000963.jpg	0
000964.jpg	1
000965.jpg	0
000966.jpg	0
000967.jpg	0
000968.jpg	0
000969.jpg	1
000970.jpg	1
000971.jpg	0
000972.jpg	1
000973.jpg	1
000974.jpg	1
000975.jpg	0
000976.jpg	1
000977.jpg	1
000978.jpg	1
000979.jpg	0
000980.jpg	0
000981.jpg	1
000982.jpg	0
000983.jpg	0
000984.jpg	0
000985.jpg	0
000986.jpg	0
000987.jpg	0
000988.jpg	0
000989.jpg	0
000990.jpg	0
000991.jpg	0
000992.jpg	1
000993.jpg	1
000994.jpg	0
000995.jpg	1
000996.jpg	1
000997.jpg	0
000998.jpg	0
000999.jpg	1
001000.jpg	0
001001.jpg	0
001002.jpg	1
001003.jpg	0
001004.jpg	0
001005.jpg	1
001006.jpg	0
001007.jpg	0
001008.jpg	0
001009.jpg	0
001010.jpg	1
001011.jpg	1
001012.jpg	0
001013.jpg	0
001014.jpg	1
001015.jpg	0
001016.jpg	0
001017.jpg	1
001018.jpg	0
001019.jpg	1
001020.jpg	1
001021.jpg	1
001022.jpg	0
001023.jpg	0
001024.jpg	1
001025.jpg	1
001026.jpg	0
001027.jpg	1
001028.jpg	1
001029.jpg	1
001030.jpg	1
001031.jpg	1
001032.jpg	0
001033.jpg	0
001034.jpg	0
001035.jpg	1
001036.jpg	0
001037.jpg	1
001038.jpg	0
001039.jpg	0
001040.jpg	1
001041.jpg	0
001042.jpg	1
001043.jpg	0
001044.jpg	0
001045.jpg	1
001046.jpg	0
001047.jpg	1
001048.jpg	1
001049.jpg	1
001050.jpg	1
001051.jpg	0
001052.jpg	0
001053.jpg	1
001054.jpg	0
001055.jpg	1
001056.jpg	1
001057.jpg	1
001058.jpg	1
001059.jpg	0
001060.jpg	0
001061.jpg	0
001062.jpg	0
001063.jpg	0
001064.jpg	0
001065.jpg	1
001066.jpg	1
001067.jpg	0
001068.jpg	1
001069.jpg	1
001070.jpg	1
001071.jpg	1
001072.jpg	0
001073.jpg	1
001074.jpg	1
001075.jpg	1
001076.jpg	0
001077.jpg	1
001078.jpg	0
001079.jpg	0
001080.jpg	0
001081.jpg	1
001082.jpg	1
001083.jpg	0
001084.jpg	1
001085.jpg	1
001086.jpg	0
001087.jpg	1
001088.jpg	1
001089.jpg	1
001090.jpg	1
001091.jpg	0
001092.jpg	0
001093.jpg	0
001094.jpg	1
001095.jpg	0
001096.jpg	0
001097.jpg	1
001098.jpg	0
001099.jpg	0
001100.jpg	0
001101.jpg	1
001102.jpg	0
001103.jpg	0
001104.jpg	1
001105.jpg	1
001106.jpg	1
001107.jpg	0
001108.jpg	1
001109.jpg	0
001110.jpg	0
001111.jpg	1
001112.jpg	1
001113.jpg	0
001114.jpg	1
001115.jpg	0
001116.jpg	1
001117.jpg	1
001118.jpg	1
001119.jpg	0
001120.jpg	1
001121.jpg	1
001122.jpg	1
001123.jpg	1
001124.jpg	1
001125.jpg	1
001126.jpg	1
001127.jpg	1
001128.jpg	0
001129.jpg	1
001130.jpg	1
001131.jpg	0
001132.jpg	1
001133.jpg	0
001134.jpg	0
001135.jpg	0
001136.jpg	0
001137.jpg	1
001138.jpg	1
001139.jpg	1
001140.jpg	0
001141.jpg	1
001142.jpg	1
001143.jpg	0
001144.jpg	0
001145.jpg	0
001146.jpg	1
001147.jpg	1
001148.jpg	1
001149.jpg	0
001150.jpg	1
001151.jpg	1
001152.jpg	1
001153.jpg	1
001154.jpg	1
001155.jpg	1
001156.jpg	0
001157.jpg	1
001158.jpg	1
001159.jpg	0
001160.jpg	1
001161.jpg	0
001162.jpg	0
001163.jpg	0
001164.jpg	1
001165.jpg	1
001166.jpg	1
001167.jpg	0
001168.jpg	1
001169.jpg	0
001170.jpg	0
001171.jpg	1
001172.jpg	1
001173.jpg	1
001174.jpg	1
001175.jpg	1
001176.jpg	0
001177.jpg	0
001178.jpg	0
001179.jpg	0
001180.jpg	1
001181.jpg	0
001182.jpg	1
001183.jpg	0
001184.jpg	1
001185.jpg	1
001186.jpg	1
001187.jpg	1
001188.jpg	1
001189.jpg	1
001190.jpg	0
001191.jpg	1
001192.jpg	0
001193.jpg	0
001194.jpg	0
001195.jpg	0
001196.jpg	0
001197.jpg	1
001198.jpg	1
001199.jpg	0
001200.jpg	0
001201.jpg	0
001202.jpg	0
001203.jpg	1
001204.jpg	1
001205.jpg	1
001206.jpg	0
001207.jpg	1
001208.jpg	0
001209.jpg	1
001210.jpg	1
001211.jpg	0
001212.jpg	1
001213.jpg	1
001214.jpg	1
001215.jpg	0
001216.jpg	0
001217.jpg	1
001218.jpg	1
001219.jpg	1
001220.jpg	1
001221.jpg	0
001222.jpg	0
001223.jpg	0
001224.jpg	0
001225.jpg	0
001226.jpg	0
001227.jpg	0
001228.jpg	1
001229.jpg	1
001230.jpg	0
001231.jpg	0
001232.jpg	1
001233.jpg	0
001234.jpg	1
001235.jpg	0
001236.jpg	1
001237.jpg	0
001238.jpg	0
001239.jpg	1
001240.jpg	0
001241.jpg	0
001242.jpg	1
001243.jpg	1
001244.jpg	0
001245.jpg	0
001246.jpg	0
001247.jpg	1
001248.jpg	1
001249.jpg	0
001250.jpg	0
001251.jpg	0
001252.jpg	0
001253.jpg	1
001254.jpg	1
001255.jpg	0
001256.jpg	1
001257.jpg	0
001258.jpg	0
001259.jpg	0
001260.jpg	1
001261.jpg	1
001262.jpg	1
001263.jpg	1
001264.jpg	1
001265.jpg	1
001266.jpg	1
001267.jpg	1
001268.jpg	1
001269.jpg	1
001270.jpg	0
001271.jpg	0
001272.jpg	0
001273.jpg	0
001274.jpg	0
001275.jpg	1
001276.jpg	1
001277.jpg	1
001278.jpg	1
001279.jpg	1
001280.jpg	0
001281.jpg	1
001282.jpg	1
001283.jpg	1
001284.jpg	1
001285.jpg	0
001286.jpg	1
001287.jpg	1
001288.jpg	1
001289.jpg	0
001290.jpg	0
001291.jpg	1
001292.jpg	0
001293.jpg	0
001294.jpg	1
001295.jpg	1
001296.jpg	0
001297.jpg	1
001298.jpg	1
001299.jpg	0
001300.jpg	0
001301.jpg	1
001302.jpg	0
001303.jpg	0
001304.jpg	0
001305.jpg	1
001306.jpg	1
001307.jpg	0
001308.jpg	1
001309.jpg	1
001310.jpg	1
001311.jpg	1
001312.jpg	1
001313.jpg	0
001314.jpg	1
001315.jpg	1
001316.jpg	1
001317.jpg	1
001318.jpg	1
001319.jpg	0
001320.jpg	1
001321.jpg	1
001322.jpg	0
001323.jpg	0
001324.jpg	1
001325.jpg	0
001326.jpg	1
001327.jpg	1
001328.jpg	0
001329.jpg	1
001330.jpg	1
001331.jpg	1
001332.jpg	1
001333.jpg	1
001334.jpg	1
001335.jpg	0
001336.jpg	1
001337.jpg	0
001338.jpg	0
001339.jpg	1
001340.jpg	0
001341.jpg	1
001342.jpg	0
001343.jpg	1
001344.jpg	1
001345.jpg	0
001346.jpg	1
001347.jpg	1
001348.jpg	1
001349.jpg	0
001350.jpg	1
001351.jpg	1
001352.jpg	0
001353.jpg	1
001354.jpg	0
001355.jpg	1
001356.jpg	1
001357.jpg	0
001358.jpg	1
001359.jpg	1
001360.jpg	1
001361.jpg	0
001362.jpg	1
001363.jpg	1
001364.jpg	1
001365.jpg	1
001366.jpg	1
001367.jpg	0
001368.jpg	1
001369.jpg	1
001370.jpg	1
001371.jpg	1
001372.jpg	1
001373.jpg	1
001374.jpg	1
001375.jpg	1
001376.jpg	0
001377.jpg	0
001378.jpg	0
001379.jpg	0
001380.jpg	0
001381.jpg	1
001382.jpg	1
001383.jpg	1
001384.jpg	1
001385.jpg	1
001386.jpg	1
001387.jpg	1
001388.jpg	0
001389.jpg	0
001390.jpg	0
001391.jpg	0
001392.jpg	0
001393.jpg	0
001394.jpg	1
001395.jpg	0
001396.jpg	0
001397.jpg	1
001398.jpg	1
001399.jpg	1
001400.jpg	0
001401.jpg	0
001402.jpg	1
001403.jpg	0
001404.jpg	0
001405.jpg	0
001406.jpg	0
001407.jpg	0
001408.jpg	1
001409.jpg	0
001410.jpg	1
001411.jpg	1
001412.jpg	0
001413.jpg	1
001414.jpg	0
001415.jpg	1
001416.jpg	0
001417.jpg	1
001418.jpg	1
001419.jpg	1
001420.jpg	1
001421.jpg	0
001422.jpg	1
001423.jpg	0
001424.jpg	0
001425.jpg	1
001426.jpg	1
001427.jpg	0
001428.jpg	0
001429.jpg	0
001430.jpg	0
001431.jpg	1
001432.jpg	0
001433.jpg	0
001434.jpg	0
001435.jpg	0
001436.jpg	0
001437.jpg	1
001438.jpg	0
001439.jpg	0
001440.jpg	0
001441.jpg	1
001442.jpg	1
001443.jpg	0
001444.jpg	0
001445.jpg	0
001446.jpg	1
001447.jpg	1
001448.jpg	1
001449.jpg	1
001450.jpg	1
001451.jpg	0
001452.jpg	1
001453.jpg	0
001454.jpg	1
001455.jpg	1
001456.jpg	1
001457.jpg	0
001458.jpg	0
001459.jpg	1
001460.jpg	1
001461.jpg	1
001462.jpg	1
001463.jpg	1
001464.jpg	0
001465.jpg	0
001466.jpg	0
001467.jpg	0
001468.jpg	0
001469.jpg	1
001470.jpg	0
001471.jpg	0
001472.jpg	1
001473.jpg	1
001474.jpg	0
001475.jpg	1
001476.jpg	0
001477.jpg	0
001478.jpg	1
001479.jpg	1
001480.jpg	1
001481.jpg	0
001482.jpg	1
001483.jpg	1
001484.jpg	0
001485.jpg	0
001486.jpg	1
001487.jpg	1
001488.jpg	1
001489.jpg	0
001490.jpg	1
001491.jpg	0
001492.jpg	1
001493.jpg	0
001494.jpg	1
001495.jpg	0
001496.jpg	1
001497.jpg	0
001498.jpg	1
001499.jpg	1
001500.jpg	0
001501.jpg	1
001502.jpg	0
001503.jpg	0
001504.jpg	1
001505.jpg	0
001506.jpg	1
001507.jpg	0
001508.jpg	0
001509.jpg	1
001510.jpg	0
001511.jpg	0
001512.jpg	1
001513.jpg	1
001514.jpg	1
001515.jpg	1
001516.jpg	1
001517.jpg	1
001518.jpg	0
001519.jpg	0
001520.jpg	0
001521.jpg	0
001522.jpg	1
001523.jpg	1
001524.jpg	1
001525.jpg	0
001526.jpg	1
001527.jpg	0
001528.jpg	1
001529.jpg	1
001530.jpg	1
001531.jpg	1
001532.jpg	0
001533.jpg	0
001534.jpg	0
001535.jpg	1
001536.jpg	1
001537.jpg	0
001538.jpg	0
001539.jpg	1
001540.jpg	1
001541.jpg	0
001542.jpg	0
001543.jpg	1
001544.jpg	0
001545.jpg	1
001546.jpg	0
001547.jpg	1
001548.jpg	1
001549.jpg	0
001550.jpg	0
001551.jpg	1
001552.jpg	1
001553.jpg	1
001554.jpg	0
001555.jpg	1
001556.jpg	1
001557.jpg	1
001558.jpg	1
001559.jpg	1
001560.jpg	0
001561.jpg	0
001562.jpg	1
001563.jpg	1
001564.jpg	1
001565.jpg	0
001566.jpg	1
001567.jpg	1
001568.jpg	0
001569.jpg	0
001570.jpg	1
001571.jpg	0
001572.jpg	1
001573.jpg	0
001574.jpg	1
001575.jpg	1
001576.jpg	1
001577.jpg	1
001578.jpg	0
001579.jpg	0
001580.jpg	1
001581.jpg	0
001582.jpg	1
001583.jpg	1
001584.jpg	0
001585.jpg	1
001586.jpg	1
001587.jpg	0
001588.jpg	1
001589.jpg	1
001590.jpg	1
001591.jpg	1
001592.jpg	1
001593.jpg	1
001594.jpg	0
001595.jpg	1
001596.jpg	1
001597.jpg	1
001598.jpg	0
001599.jpg	0
001600.jpg	1
001601.jpg	0
001602.jpg	0
001603.jpg	1
001604.jpg	1
001605.jpg	1
001606.jpg	1
001607.jpg	1
001608.jpg	0
001609.jpg	0
001610.jpg	0
001611.jpg	0
001612.jpg	1
001613.jpg	0
001614.jpg	1
001615.jpg	0
001616.jpg	0
001617.jpg	0
001618.jpg	0
001619.jpg	1
001620.jpg	1
001621.jpg	1
001622.jpg	1
001623.jpg	1
001624.jpg	0
001625.jpg	1
001626.jpg	1
001627.jpg	0
001628.jpg	0
001629.jpg	1
001630.jpg	1
001631.jpg	1
001632.jpg	0
001633.jpg	1
001634.jpg	0
001635.jpg	1
001636.jpg	0
001637.jpg	1
001638.jpg	1
001639.jpg	1
001640.jpg	1
001641.jpg	0
001642.jpg	0
001643.jpg	1
001644.jpg	0
001645.jpg	1
001646.jpg	0
001647.jpg	0
001648.jpg	1
001649.jpg	1
001650.jpg	1
001651.jpg	0
001652.jpg	1
001653.jpg	1
001654.jpg	0
001655.jpg	1
001656.jpg	0
001657.jpg	1
001658.jpg	0
001659.jpg	0
001660.jpg	1
001661.jpg	0
001662.jpg	1
001663.jpg	1
001664.jpg	1
001665.jpg	1
001666.jpg	0
001667.jpg	1
001668.jpg	0
001669.jpg	0
001670.jpg	0
001671.jpg	1
001672.jpg	1
001673.jpg	1
001674.jpg	0
001675.jpg	1
001676.jpg	0
001677.jpg	1
001678.jpg	1
001679.jpg	0
001680.jpg	1
001681.jpg	0
001682.jpg	0
001683.jpg	1
001684.jpg	0
001685.jpg	0
001686.jpg	1
001687.jpg	1
001688.jpg	1
001689.jpg	0
001690.jpg	1
001691.jpg	0
001692.jpg	1
001693.jpg	0
001694.jpg	0
001695.jpg	0
001696.jpg	0
001697.jpg	1
001698.jpg	0
001699.jpg	1
001700.jpg	1
001701.jpg	0
001702.jpg	1
001703.jpg	1
001704.jpg	0
001705.jpg	0
001706.jpg	0
001707.jpg	0
001708.jpg	1
001709.jpg	0
001710.jpg	1
001711.jpg	1
001712.jpg	0
001713.jpg	0
001714.jpg	1
001715.jpg	0
001716.jpg	0
001717.jpg	1
001718.jpg	1
001719.jpg	0
001720.jpg	0
001721.jpg	0
001722.jpg	1
001723.jpg	0
001724.jpg	0
001725.jpg	1
001726.jpg	0
001727.jpg	0
001728.jpg	1
001729.jpg	0
001730.jpg	0
001731.jpg	1
001732.jpg	0
001733.jpg	1
001734.jpg	1
001735.jpg	0
001736.jpg	0
001737.jpg	0
001738.jpg	1
001739.jpg	1
001740.jpg	0
001741.jpg	0
001742.jpg	0
001743.jpg	1
001744.jpg	0
001745.jpg	0
001746.jpg	0
001747.jpg	0
001748.jpg	1
001749.jpg	0
001750.jpg	1
001751.jpg	0
001752.jpg	0
001753.jpg	0
001754.jpg	0
001755.jpg	1
001756.jpg	1
001757.jpg	1
001758.jpg	0
001759.jpg	0
001760.jpg	1
001761.jpg	0
001762.jpg	0
001763.jpg	0
001764.jpg	1
001765.jpg	1
001766.jpg	0
001767.jpg	1
001768.jpg	1
001769.jpg	1
001770.jpg	1
001771.jpg	0
001772.jpg	0
001773.jpg	0
001774.jpg	1
001775.jpg	1
001776.jpg	0
001777.jpg	1
001778.jpg	1
001779.jpg	1
001780.jpg	0
001781.jpg	0
001782.jpg	0
001783.jpg	1
001784.jpg	0
001785.jpg	1
001786.jpg	0
001787.jpg	1
001788.jpg	1
001789.jpg	0
001790.jpg	1
001791.jpg	0
001792.jpg	1
001793.jpg	0
001794.jpg	0
001795.jpg	1
001796.jpg	0
001797.jpg	1
001798.jpg	0
001799.jpg	0
001800.jpg	0
001801.jpg	1
001802.jpg	1
001803.jpg	1
001804.jpg	1
001805.jpg	1
001806.jpg	0
001807.jpg	1
001808.jpg	0
001809.jpg	0
001810.jpg	0
001811.jpg	0
001812.jpg	1
001813.jpg	1
001814.jpg	1
001815.jpg	1
001816.jpg	0
001817.jpg	0
001818.jpg	1
001819.jpg	0
001820.jpg	1
001821.jpg	1
001822.jpg	1
001823.jpg	1
001824.jpg	0
001825.jpg	1
001826.jpg	1
001827.jpg	1
001828.jpg	1
001829.jpg	0
001830.jpg	1
001831.jpg	1
001832.jpg	0
001833.jpg	0
001834.jpg	0
001835.jpg	1
001836.jpg	1
001837.jpg	1
001838.jpg	1
001839.jpg	0
001840.jpg	0
001841.jpg	1
001842.jpg	1
001843.jpg	0
001844.jpg	0
001845.jpg	1
001846.jpg	0
001847.jpg	0
001848.jpg	0
001849.jpg	1
001850.jpg	1
001851.jpg	0
001852.jpg	0
001853.jpg	0
001854.jpg	1
001855.jpg	0
001856.jpg	1
001857.jpg	0
001858.jpg	1
001859.jpg	0
001860.jpg	1
001861.jpg	0
001862.jpg	0
001863.jpg	1
001864.jpg	0
001865.jpg	0
001866.jpg	0
001867.jpg	0
001868.jpg	0
001869.jpg	1
001870.jpg	0
001871.jpg	0
001872.jpg	0
001873.jpg	1
001874.jpg	0
001875.jpg	1
001876.jpg	1
001877.jpg	0
001878.jpg	0
001879.jpg	1
001880.jpg	1
001881.jpg	1
001882.jpg	0
001883.jpg	0
001884.jpg	0
001885.jpg	1
001886.jpg	1
001887.jpg	0
001888.jpg	0
001889.jpg	0
001890.jpg	0
001891.jpg	1
001892.jpg	0
001893.jpg	1
001894.jpg	1
001895.jpg	0
001896.jpg	0
001897.jpg	1
001898.jpg	0
001899.jpg	1
001900.jpg	0
001901.jpg	1
001902.jpg	0
001903.jpg	1
001904.jpg	1
001905.jpg	0
001906.jpg	1
001907.jpg	1
001908.jpg	1
001909.jpg	1
001910.jpg	1
001911.jpg	1
001912.jpg	0
001913.jpg	0
001914.jpg	0
001915.jpg	0
001916.jpg	1
001917.jpg	0
001918.jpg	0
001919.jpg	1
001920.jpg	0
001921.jpg	0
001922.jpg	0
001923.jpg	1
001924.jpg	1
001925.jpg	0
001926.jpg	1
001927.jpg	0
001928.jpg	0
001929.jpg	0
001930.jpg	1
001931.jpg	0
001932.jpg	1
001933.jpg	1
001934.jpg	0
001935.jpg	1
001936.jpg	0
001937.jpg	1
001938.jpg	0
001939.jpg	0
001940.jpg	1
001941.jpg	0
001942.jpg	0
001943.jpg	1
001944.jpg	1
001945.jpg	0
001946.jpg	1
001947.jpg	0
001948.jpg	1
001949.jpg	1
001950.jpg	0
001951.jpg	1
001952.jpg	0
001953.jpg	0
001954.jpg	0
001955.jpg	1
001956.jpg	0
001957.jpg	0
001958.jpg	0
001959.jpg	0
001960.jpg	1
001961.jpg	0
001962.jpg	1
001963.jpg	1
001964.jpg	0
001965.jpg	0
001966.jpg	0
001967.jpg	0
001968.jpg	0
001969.jpg	0
001970.jpg	1
001971.jpg	0
001972.jpg	1
001973.jpg	1
001974.jpg	1
001975.jpg	0
001976.jpg	0
001977.jpg	1
001978.jpg	1
001979.jpg	1
001980.jpg	1
001981.jpg	0
001982.jpg	0
001983.jpg	1
001984.jpg	0
001985.jpg	0
001986.jpg	1
001987.jpg	1
001988.jpg	0
001989.jpg	1
001990.jpg	0
001991.jpg	0
001992.jpg	1
001993.jpg	1
001994.jpg	0
001995.jpg	1
001996.jpg	1
001997.jpg	0
001998.jpg	1
001999.jpg	0
[truncated: 200,600 more rows]
