# Supplementary material
Source: ML conference proceedings conference paper supplement (https://proceedings.neurips.cc/paper_files/paper/2022/hash/64ad7b36b497f375ded2e6f15713ed4c-Abstract.html)
Supplement: Supplementary file 1 [file 64ad7b36b497f375ded2e6f15713ed4c-Supplemental-Conference.zip › supplementary/code/assets/tasks/agreement_table.csv]

task_idx	task	as
31	resnet18	0.8759999871253967
30	resnet18	0.8614000082015991
29	resnet18	0.9002000093460083
28	resnet18	0.8876000046730042
27	resnet18	0.8809999823570251
26	resnet18	0.8687999844551086
25	resnet18	0.8907999992370605
24	resnet18	0.8694000244140625
23	resnet18	0.9074000120162964
22	resnet18	0.868399977684021
15	resnet18	0.8899999856948853
14	resnet18	0.8755999803543091
21	resnet18	0.8862000107765198
13	resnet18	0.8867999911308289
12	resnet18	0.8593999743461609
20	resnet18	0.8723999857902527
11	resnet18	0.8823999762535095
10	resnet18	0.8877999782562256
9	resnet18	0.875
19	resnet18	0.8651999831199646
8	resnet18	0.8759999871253967
7	resnet18	0.878000020980835
6	resnet18	0.8804000020027161
18	resnet18	0.8773999810218811
5	resnet18	0.8848000168800354
4	resnet18	0.8687999844551086
3	resnet18	0.8877999782562256
17	resnet18	0.8817999958992004
2	resnet18	0.8748000264167786
1	resnet18	0.8822000026702881
0	resnet18	0.8773999810218811
16	resnet18	0.8802000284194946
31	mlp	0.9380000233650208
30	mlp	0.9373999834060668
29	mlp	0.9366000294685364
28	mlp	0.9484000205993652
27	mlp	0.9409999847412108
26	mlp	0.9477999806404114
25	mlp	0.9332000017166138
24	mlp	0.929199993610382
23	mlp	0.9516000151634216
22	mlp	0.9387999773025512
21	mlp	0.944599986076355
20	mlp	0.9337999820709229
19	mlp	0.9417999982833862
18	mlp	0.9254000186920166
17	mlp	0.9355999827384948
16	mlp	0.9534000158309937
15	mlp	0.940400004386902
14	mlp	0.9616000056266784
13	mlp	0.9319999814033508
12	mlp	0.946399986743927
11	mlp	0.9563999772071838
10	mlp	0.9386000037193298
9	mlp	0.9327999949455258
8	mlp	0.9283999800682068
7	mlp	0.9391999840736388
6	mlp	0.9513999819755554
5	mlp	0.9312000274658204
4	mlp	0.9422000050544742
3	mlp	0.9383999705314636
2	mlp	0.9549999833106996
1	mlp	0.9467999935150146
0	mlp	0.9363999962806702
31	vit	0.8051999807357788
15	vit	0.6977999806404114
30	vit	0.7373999953269958
14	vit	0.6179999709129333
29	vit	0.7229999899864197
13	vit	0.6614000201225281
28	vit	0.6412000060081482
12	vit	0.7211999893188477
27	vit	0.7026000022888184
11	vit	0.7501999735832214
26	vit	0.6919999718666077
10	vit	0.6460000276565552
25	vit	0.7289999723434448
9	vit	0.6916000247001648
24	vit	0.7034000158309937
8	vit	0.7269999980926514
23	vit	0.6930000185966492
7	vit	0.7368000149726868
22	vit	0.7174000144004822
6	vit	0.7002000212669373
21	vit	0.7113999724388123
5	vit	0.7156000137329102
20	vit	0.7405999898910522
4	vit	0.7153999805450441
19	vit	0.6955999732017517
3	vit	0.7062000036239624
18	vit	0.6970000267028809
2	vit	0.6448000073432922
17	vit	0.6761999726295471
1	vit	0.6998000144958496
16	vit	0.7269999980926514
0	vit	0.6966000199317932
5	resnet18_d8	0.8835999965667725
6	resnet18_d8	0.9431999921798706
7	resnet18_d8	0.9233999848365784
4	resnet18_d8	0.920199990272522
3	resnet18_d8	0.9272000193595886
1	resnet18_d8	0.9309999942779541
2	resnet18_d8	0.9580000042915344
0	resnet18_d8	0.9639999866485596
