# Supplementary material
Source: ML conference proceedings conference paper supplement (https://proceedings.neurips.cc/paper_files/paper/2022/hash/64ad7b36b497f375ded2e6f15713ed4c-Abstract.html)
Supplement: Supplementary file 1 [file 64ad7b36b497f375ded2e6f15713ed4c-Supplemental-Conference.zip › supplementary/code/assets/tasks/ssl_tasks.csv]

	resnet50-0	resnet50-1	resnet50-2	resnet50-3
0	0	0	0	0
1	1	1	1	1
2	1	0	0	1
3	1	1	0	0
4	1	0	0	1
5	1	0	0	1
6	1	1	1	1
7	1	1	0	0
8	0	0	1	0
9	0	0	0	0
10	0	1	1	1
11	1	0	1	1
12	1	1	0	0
13	1	0	1	0
14	1	1	1	0
15	1	0	1	0
16	1	0	1	0
17	0	0	0	0
18	0	0	0	0
19	1	0	1	0
20	0	1	0	1
21	0	0	0	0
22	1	1	0	1
23	0	0	0	1
24	1	1	1	1
25	0	0	1	1
26	0	0	1	0
27	1	1	0	1
28	0	1	1	1
29	0	1	0	0
30	0	0	0	1
31	1	0	1	0
32	1	0	0	1
33	0	0	1	0
34	0	1	1	1
35	0	0	1	1
36	1	0	1	0
37	0	0	0	1
38	1	0	1	0
39	1	0	1	1
40	0	0	1	1
41	0	1	0	0
42	1	1	0	1
43	1	1	0	0
44	1	0	0	1
45	1	0	0	1
46	1	1	0	1
47	1	1	0	0
48	1	1	0	0
49	0	0	0	1
50	0	1	0	1
51	1	0	1	0
52	1	1	0	0
53	1	0	1	1
54	0	1	0	0
55	0	1	1	1
56	0	0	0	0
57	0	0	1	0
58	0	1	0	0
59	0	0	0	0
60	1	0	0	1
61	1	0	0	1
62	1	0	0	0
63	1	1	1	1
64	1	0	0	1
65	1	0	0	1
66	1	1	0	0
67	1	0	0	1
68	1	1	1	0
69	0	0	0	0
70	0	0	0	1
71	1	0	1	1
72	0	0	0	1
73	1	1	1	0
74	0	0	1	1
75	0	0	0	1
76	1	0	1	0
77	0	1	1	0
78	1	1	1	1
79	1	0	0	1
80	0	0	1	0
81	0	1	0	1
82	0	1	1	1
83	0	0	1	0
84	1	1	0	1
85	0	1	1	1
86	1	1	1	0
87	1	1	1	0
88	1	1	1	0
89	0	0	1	0
90	0	0	1	1
91	0	1	1	0
92	1	0	0	1
93	0	1	1	0
94	1	0	0	1
95	1	0	1	1
96	1	0	1	1
97	1	0	1	1
98	1	1	1	1
99	1	1	0	1
100	1	0	0	0
101	0	0	0	0
102	1	0	1	0
103	0	1	1	1
104	0	0	1	1
105	1	1	0	1
106	1	0	0	0
107	1	0	1	0
108	0	0	0	0
109	1	0	1	0
110	1	0	0	0
111	1	0	0	0
112	1	0	0	1
113	1	0	0	1
114	1	1	0	0
115	0	0	0	0
116	1	0	1	1
117	1	1	1	1
118	1	0	0	1
119	0	1	0	0
120	0	1	0	1
121	0	1	0	1
122	1	1	1	1
123	0	1	0	0
124	0	1	0	1
125	1	0	0	0
126	1	0	0	1
127	1	1	1	1
128	0	0	0	0
129	0	0	0	0
130	0	1	1	1
131	1	1	1	0
132	0	0	0	0
133	1	1	0	0
134	1	1	0	0
135	0	0	0	0
136	1	0	0	1
137	1	0	0	1
138	0	1	0	1
139	0	0	0	1
140	0	0	0	1
141	0	1	0	0
142	0	0	0	0
143	1	1	1	1
144	0	0	1	0
145	1	1	1	0
146	1	0	1	1
147	1	0	0	0
148	1	0	1	0
149	1	1	1	1
150	1	0	0	0
151	0	0	1	1
152	1	1	1	0
153	0	1	0	1
154	0	1	1	1
155	1	0	0	0
156	0	0	0	1
157	0	0	1	0
158	1	1	1	1
159	0	0	0	1
160	1	1	0	0
161	1	0	0	0
162	1	1	1	0
163	1	1	1	0
164	1	1	0	1
165	1	0	1	1
166	1	1	1	1
167	0	1	1	0
168	1	1	1	1
169	0	0	1	1
170	1	0	0	1
171	0	1	1	1
172	1	1	0	0
173	0	0	1	0
174	1	0	1	0
175	1	1	1	0
176	1	1	0	1
177	0	1	1	1
178	1	1	1	0
179	0	1	1	1
180	0	1	1	0
181	0	1	1	0
182	0	0	1	0
183	0	0	1	1
184	0	0	0	1
185	0	0	1	1
186	1	1	1	1
187	0	1	0	0
188	1	1	1	0
189	0	1	1	0
190	0	0	0	1
191	0	1	0	0
192	1	0	0	0
193	1	0	0	1
194	0	0	0	0
195	1	0	1	0
196	0	0	1	1
197	0	0	1	0
198	0	1	0	0
199	0	0	1	0
200	1	1	1	1
201	1	0	0	1
202	1	1	0	0
203	1	0	0	0
204	0	1	1	1
205	1	1	0	0
206	1	1	0	1
207	0	0	1	0
208	1	1	1	0
209	1	0	1	1
210	1	0	0	1
211	1	1	0	0
212	1	1	0	1
213	0	1	0	0
214	1	0	1	1
215	0	0	0	0
216	1	0	1	0
217	0	0	1	0
218	0	1	1	1
219	1	0	1	0
220	0	1	0	0
221	1	0	0	0
222	1	1	0	1
223	1	0	1	1
224	1	1	1	1
225	1	0	1	1
226	1	0	0	1
227	0	0	0	1
228	1	1	0	1
229	0	0	1	0
230	1	1	1	0
231	1	1	1	1
232	0	1	1	1
233	0	0	1	0
234	1	1	0	0
235	0	1	1	1
236	1	0	0	1
237	1	1	0	0
238	1	0	0	1
239	0	1	1	1
240	1	0	0	1
241	0	0	1	1
242	0	1	0	0
243	1	1	0	1
244	1	0	0	0
245	0	1	1	1
246	0	1	1	0
247	1	1	0	0
248	1	0	1	1
249	0	1	0	1
250	1	0	0	1
251	0	0	1	1
252	0	1	1	1
253	0	0	1	0
254	1	1	0	1
255	1	0	0	1
256	1	1	1	0
257	1	0	0	1
258	1	1	1	0
259	1	1	0	0
260	0	1	1	1
261	1	0	0	1
262	1	1	0	0
263	1	1	0	1
264	0	0	0	0
265	1	0	1	1
266	1	0	1	0
267	0	1	1	0
268	1	0	0	1
269	1	0	1	0
270	1	0	1	1
271	0	1	1	0
272	0	1	1	1
273	1	0	1	0
274	1	1	1	1
275	1	0	0	1
276	0	0	1	0
277	0	0	0	0
278	1	1	1	0
279	0	0	1	1
280	1	0	0	0
281	0	1	0	1
282	0	0	0	1
283	1	0	1	1
284	0	0	1	0
285	1	0	1	1
286	0	1	1	1
287	0	0	1	0
288	0	0	0	0
289	1	0	1	0
290	1	0	0	1
291	1	0	0	0
292	0	0	0	0
293	1	0	1	1
294	1	1	0	0
295	1	1	1	1
296	1	1	0	1
297	0	0	1	0
298	1	0	0	0
299	0	1	1	1
300	0	1	1	1
301	1	0	1	1
302	0	0	0	1
303	0	1	0	1
304	1	1	0	1
305	0	1	1	0
306	1	1	1	1
307	1	1	1	0
308	0	0	0	1
309	1	0	0	0
310	1	1	0	0
311	1	0	0	1
312	1	0	0	0
313	1	1	0	1
314	0	0	1	0
315	0	0	1	0
316	1	1	0	0
317	0	0	0	1
318	0	1	1	0
319	1	0	1	1
320	1	1	0	0
321	0	1	0	0
322	1	1	1	1
323	0	1	0	0
324	1	0	1	1
325	1	0	0	1
326	1	0	1	1
327	0	1	0	0
328	1	0	0	0
329	1	1	0	0
330	1	1	0	0
331	1	0	1	0
332	1	0	1	1
333	0	0	1	1
334	0	0	0	0
335	0	1	0	1
336	0	1	0	1
337	0	0	0	1
338	0	0	1	1
339	0	0	0	0
340	1	0	1	0
341	0	1	0	0
342	0	1	0	0
343	1	1	0	1
344	0	0	1	0
345	0	1	1	1
346	0	1	0	1
347	1	1	0	0
348	0	1	0	1
349	0	1	0	0
350	0	1	0	0
351	1	1	0	1
352	1	0	1	0
353	1	0	1	0
354	1	1	0	1
355	1	1	0	1
356	1	0	1	1
357	1	1	1	0
358	0	1	1	0
359	0	1	1	0
360	1	0	1	1
361	0	0	0	0
362	1	1	1	0
363	1	1	0	1
364	1	1	0	0
365	1	0	0	0
366	0	1	0	0
367	1	1	1	1
368	1	1	1	0
369	1	0	1	0
370	1	0	0	0
371	0	1	0	0
372	1	1	0	1
373	0	1	0	0
374	0	0	1	0
375	1	0	0	1
376	0	0	1	1
377	0	0	1	0
378	0	1	1	1
379	0	0	0	0
380	0	0	0	1
381	1	1	1	1
382	1	1	0	0
383	0	1	1	0
384	0	0	1	0
385	1	1	1	1
386	1	1	0	1
387	0	1	1	1
388	0	0	0	0
389	1	0	0	1
390	0	1	1	1
391	1	1	0	0
392	0	0	1	1
393	1	0	0	1
394	1	1	0	0
395	1	0	0	1
396	1	1	0	0
397	1	1	1	0
398	1	1	0	1
399	0	1	1	1
400	0	1	1	1
401	0	0	0	1
402	0	1	0	1
403	0	1	0	0
404	1	1	1	0
405	0	1	1	0
406	1	0	1	0
407	0	0	0	1
408	1	1	1	0
409	0	0	1	1
410	1	1	0	0
411	0	0	0	1
412	1	1	0	0
413	0	1	1	0
414	0	1	0	1
415	1	0	0	0
416	1	0	1	1
417	0	1	1	0
418	1	0	0	0
419	1	1	1	1
420	0	1	0	1
421	0	1	1	0
422	1	1	0	0
423	1	1	0	1
424	0	0	0	0
425	0	0	0	1
426	0	1	1	0
427	1	0	0	1
428	1	1	1	1
429	0	1	1	1
430	1	0	0	0
431	0	1	1	0
432	1	0	0	1
433	0	1	1	1
434	0	1	1	0
435	0	1	1	1
436	0	0	0	1
437	1	1	1	1
438	1	0	1	1
439	0	0	0	0
440	0	1	1	1
441	0	0	0	1
442	1	0	0	1
443	1	0	1	1
444	1	0	1	0
445	1	1	1	0
446	0	1	1	1
447	0	1	0	1
448	1	0	1	1
449	0	1	1	1
450	0	0	0	0
451	1	0	0	0
452	1	0	1	1
453	1	0	0	1
454	1	0	0	1
455	0	1	1	0
456	1	1	1	1
457	0	1	0	0
458	0	0	1	1
459	0	0	0	1
460	1	0	0	1
461	1	1	0	0
462	1	0	0	1
463	0	0	0	1
464	1	1	1	1
465	0	1	1	1
466	1	1	0	1
467	1	1	1	0
468	0	1	1	0
469	0	1	1	0
470	1	1	1	1
471	0	0	1	1
472	1	1	1	0
473	0	0	1	1
474	0	1	1	0
475	1	0	0	1
476	1	0	0	0
477	1	0	0	1
478	0	1	1	1
479	1	0	0	0
480	1	0	1	0
481	0	1	1	1
482	1	1	0	1
483	0	1	1	1
484	0	1	0	1
485	0	0	0	1
486	1	0	0	1
487	1	0	1	1
488	1	1	0	1
489	0	1	0	0
490	0	1	0	1
491	0	0	1	0
492	1	1	1	1
493	0	1	1	1
494	0	1	0	0
495	1	1	1	0
496	1	1	0	0
497	0	0	0	1
498	1	0	0	0
499	1	1	0	0
500	1	0	0	0
501	1	0	1	1
502	0	1	1	1
503	1	0	0	0
504	0	1	0	0
505	1	1	0	1
506	1	0	0	0
507	0	1	1	1
508	1	1	1	0
509	0	1	0	0
510	0	1	1	0
511	1	1	0	1
512	1	0	1	1
513	0	0	0	1
514	0	1	1	0
515	0	0	1	0
516	1	1	0	0
517	0	1	0	0
518	0	0	1	1
519	1	0	0	0
520	1	1	0	1
521	0	1	1	1
522	0	1	0	0
523	1	1	0	0
524	1	0	0	1
525	1	1	0	1
526	0	1	1	1
527	1	0	1	0
528	1	1	0	0
529	1	1	0	1
530	1	0	1	1
531	1	1	0	0
532	1	0	1	1
533	0	0	0	1
534	0	0	1	1
535	0	1	0	0
536	1	0	1	1
537	0	1	1	1
538	0	1	0	0
539	0	0	0	0
540	0	1	0	1
541	1	0	1	0
542	0	0	0	1
543	0	1	1	1
544	1	1	1	1
545	1	1	1	0
546	1	0	1	0
547	0	1	0	0
548	0	0	1	0
549	0	0	1	0
550	0	0	1	0
551	1	1	0	0
552	1	1	0	0
553	1	0	1	1
554	0	0	0	1
555	0	0	0	1
556	0	0	1	1
557	0	1	0	1
558	0	0	0	1
559	0	1	1	0
560	0	1	0	0
561	1	0	0	1
562	0	1	1	0
563	1	1	1	1
564	0	0	1	0
565	0	0	0	1
566	1	0	0	0
567	1	0	0	0
568	1	1	1	0
569	0	0	1	0
570	0	1	1	0
571	0	0	0	1
572	1	1	0	0
573	0	0	0	1
574	1	0	0	0
575	0	1	1	1
576	1	0	0	1
577	1	0	1	0
578	0	0	0	1
579	1	0	0	0
580	1	0	0	1
581	1	1	0	1
582	1	1	0	0
583	1	0	1	0
584	1	0	1	1
585	1	0	0	0
586	0	0	0	1
587	1	1	1	1
588	1	1	1	1
589	1	0	1	1
590	1	1	0	1
591	1	1	1	1
592	0	0	0	1
593	1	0	0	1
594	1	0	0	0
595	1	1	0	0
596	0	0	0	1
597	0	0	0	0
598	0	1	0	0
599	1	0	0	1
600	1	0	0	0
601	1	0	1	1
602	1	0	0	0
603	0	0	1	1
604	1	0	0	1
605	0	1	1	0
606	1	1	0	1
607	1	0	1	0
608	0	0	1	1
609	1	1	0	0
610	0	0	0	0
611	0	1	1	1
612	1	1	1	1
613	1	1	1	1
614	1	0	1	0
615	1	1	1	1
616	0	1	0	1
617	1	0	1	1
618	0	0	0	1
619	1	1	1	1
620	0	1	1	1
621	1	1	0	1
622	0	1	0	1
623	1	1	1	0
624	0	0	1	0
625	1	1	0	1
626	0	0	1	1
627	1	0	0	0
628	0	0	0	1
629	0	0	1	0
630	0	1	1	1
631	1	0	0	0
632	1	1	0	1
633	0	0	0	0
634	1	0	1	0
635	1	1	0	0
636	0	1	1	0
637	0	1	0	0
638	0	1	1	0
639	0	0	1	1
640	1	0	1	1
641	0	1	0	0
642	0	1	1	1
643	1	1	0	1
644	1	1	0	1
645	1	1	0	1
646	0	0	1	0
647	1	1	0	0
648	0	1	0	1
649	0	1	1	1
650	0	1	0	0
651	1	1	0	1
652	1	1	1	1
653	1	0	0	0
654	0	1	1	0
655	0	0	0	0
656	0	0	0	0
657	1	1	1	1
658	0	1	0	0
659	1	0	0	0
660	1	0	0	1
661	0	1	1	1
662	1	1	0	0
663	1	0	0	0
664	1	0	1	1
665	0	1	1	1
666	1	1	1	0
667	0	1	0	1
668	1	1	1	1
669	1	1	0	1
670	0	1	1	0
671	1	1	0	0
672	1	1	1	0
673	1	1	1	1
674	0	1	1	1
675	1	0	1	0
676	1	0	0	1
677	0	1	1	1
678	1	1	1	1
679	1	0	1	0
680	0	1	1	1
681	1	0	1	0
682	0	1	0	0
683	1	0	1	1
684	1	0	1	1
685	0	0	1	0
686	1	0	0	1
687	0	1	0	0
688	1	1	1	0
689	0	1	1	0
690	1	1	1	1
691	0	0	1	0
692	0	1	0	0
693	0	1	1	1
694	0	1	0	0
695	1	1	0	0
696	0	1	1	1
697	1	0	1	1
698	0	0	0	0
699	1	0	0	1
700	0	0	1	1
701	0	1	0	1
702	0	1	1	1
703	0	1	1	0
704	1	0	0	1
705	0	0	1	1
706	1	1	0	0
707	1	0	0	1
708	1	0	0	0
709	0	1	0	0
710	1	0	0	1
711	0	1	1	1
712	0	1	0	0
713	1	1	0	0
714	1	0	0	1
715	1	0	0	0
716	0	0	0	1
717	1	1	1	1
718	0	0	0	1
719	0	1	1	1
720	0	1	1	1
721	0	0	1	1
722	1	1	0	0
723	1	0	1	0
724	1	1	0	0
725	0	0	1	1
726	0	0	0	0
727	1	1	1	0
728	0	1	1	1
729	1	1	1	0
730	1	0	1	1
731	0	0	0	1
732	0	0	1	1
733	0	1	0	0
734	1	0	1	0
735	1	0	0	0
736	0	0	1	1
737	0	1	1	1
738	0	1	0	1
739	0	0	1	0
740	0	0	1	0
741	1	0	1	1
742	0	1	1	1
743	1	1	0	0
744	0	0	1	0
745	0	1	1	1
746	1	1	0	0
747	0	1	0	1
748	0	1	0	0
749	1	0	0	0
750	1	0	1	0
751	0	1	0	1
752	0	0	1	0
753	1	0	1	1
754	1	1	0	1
755	0	0	0	0
756	1	1	1	1
757	0	1	0	0
758	0	1	1	0
759	1	1	0	0
760	0	1	0	0
761	1	1	0	1
762	0	0	0	0
763	1	0	0	0
764	1	1	1	1
765	0	1	0	0
766	1	0	0	1
767	0	0	1	1
768	1	1	1	1
769	1	1	1	1
770	1	1	0	1
771	1	1	0	0
772	1	0	0	1
773	0	0	0	1
774	0	0	0	1
775	0	1	1	0
776	1	0	1	1
777	1	0	0	0
778	1	1	0	1
779	0	1	0	1
780	0	1	0	1
781	1	1	0	1
782	0	0	0	1
783	0	0	1	1
784	0	1	1	0
785	0	0	0	0
786	0	0	0	1
787	0	0	0	1
788	0	0	1	1
789	1	1	1	0
790	0	1	0	0
791	1	1	1	0
792	1	0	1	0
793	0	0	0	0
794	1	1	0	0
795	0	1	1	1
796	0	1	0	0
797	0	1	1	1
798	0	0	1	1
799	0	1	1	1
800	0	0	0	1
801	1	1	1	1
802	0	1	0	1
803	0	0	0	1
804	0	1	1	1
805	1	0	0	0
806	1	0	1	1
807	1	1	0	1
808	0	1	0	0
809	1	0	1	0
810	0	1	0	1
811	1	0	0	1
812	1	0	1	1
813	0	0	0	0
814	0	0	1	0
815	1	1	0	1
816	0	1	1	1
817	0	0	1	1
818	1	1	0	1
819	0	0	1	1
820	1	0	0	0
821	0	1	0	0
822	0	0	0	0
823	1	1	0	1
824	1	0	1	0
825	1	1	1	0
826	1	1	0	1
827	0	1	0	0
828	1	1	1	0
829	1	1	1	0
830	0	1	0	0
831	1	1	1	1
832	1	0	1	0
833	1	1	0	1
834	1	0	0	1
835	1	1	1	1
836	0	1	1	1
837	0	0	0	1
838	0	1	1	1
839	0	0	1	0
840	1	1	0	1
841	0	1	0	0
842	1	1	0	0
843	0	0	1	1
844	0	1	1	1
845	1	0	1	0
846	1	0	1	1
847	1	1	0	0
848	1	0	0	1
849	1	1	1	1
850	0	1	1	0
851	1	0	1	0
852	0	0	1	0
853	0	0	0	1
854	0	0	0	0
855	1	0	0	1
856	1	1	1	0
857	0	0	0	0
858	0	0	1	1
859	0	1	1	1
860	1	1	1	0
861	1	1	1	0
862	1	0	0	0
863	1	0	1	1
864	0	0	0	0
865	0	0	1	0
866	1	0	0	0
867	1	0	1	0
868	0	0	0	1
869	0	0	1	0
870	0	1	0	1
871	0	0	0	1
872	1	0	1	0
873	1	0	0	1
874	1	0	0	1
875	0	0	1	0
876	0	1	1	0
877	1	1	1	1
878	1	0	0	0
879	1	0	0	0
880	1	0	0	0
881	1	1	1	0
882	0	0	1	0
883	1	0	1	1
884	1	1	1	0
885	1	1	1	1
886	1	0	1	0
887	0	1	0	1
888	1	0	0	0
889	0	0	0	1
890	1	1	1	0
891	1	1	0	0
892	1	0	0	0
893	0	1	0	1
894	0	0	1	0
895	0	1	1	0
896	0	1	1	1
897	1	0	0	0
898	1	1	0	1
899	1	1	1	1
900	1	1	1	1
901	1	0	0	0
902	1	0	1	1
903	1	1	0	1
904	1	1	1	1
905	1	0	0	0
906	0	1	0	0
907	0	1	0	1
908	0	0	1	1
909	1	0	0	1
910	0	1	1	0
911	0	0	0	1
912	0	1	1	1
913	0	1	0	0
914	1	1	0	1
915	1	0	1	0
916	0	1	1	0
917	1	1	0	1
918	0	1	1	0
919	0	1	1	1
920	1	1	0	1
921	0	1	0	1
922	0	0	1	0
923	0	1	0	1
924	0	1	1	1
925	1	0	0	0
926	1	1	1	0
927	0	0	0	1
928	0	0	1	1
929	0	0	0	0
930	1	0	0	0
931	0	1	0	0
932	0	0	0	0
933	0	1	0	0
934	1	1	0	1
935	1	1	1	0
936	1	0	0	1
937	1	1	1	1
938	0	1	0	0
939	1	1	1	1
940	1	0	1	0
941	0	0	0	1
942	1	0	0	0
943	0	1	1	0
944	0	0	0	0
945	0	1	1	1
946	1	1	1	1
947	1	0	0	1
948	0	1	0	0
949	0	0	1	0
950	1	1	1	0
951	0	1	0	1
952	0	1	1	0
953	1	1	1	0
954	1	0	1	1
955	1	0	1	0
956	1	1	1	0
957	0	1	0	0
958	1	0	0	1
959	1	1	0	0
960	1	0	1	1
961	0	1	0	0
962	1	1	0	0
963	0	0	0	0
964	0	1	1	1
965	1	0	0	1
966	1	1	1	1
967	1	0	0	1
968	1	1	0	1
969	0	0	1	0
970	1	1	1	1
971	1	0	0	0
972	0	1	0	1
973	1	1	1	0
974	0	0	0	0
975	0	1	0	1
976	0	1	0	0
977	1	1	0	0
978	1	0	0	1
979	0	1	1	1
980	1	0	0	1
981	1	0	1	0
982	0	0	1	1
983	0	1	0	0
984	0	0	1	1
985	1	1	0	1
986	0	1	1	1
987	1	0	0	0
988	0	1	1	1
989	0	0	1	1
990	0	1	0	0
991	1	0	0	1
992	1	0	1	1
993	0	0	1	1
994	1	1	0	0
995	0	1	0	1
996	0	0	1	1
997	1	0	0	1
998	1	0	1	0
999	0	0	0	0
1000	1	0	1	1
1001	1	1	0	1
1002	0	0	0	1
1003	1	0	1	1
1004	0	1	0	1
1005	0	1	1	1
1006	1	0	0	0
1007	0	1	1	1
1008	1	0	0	1
1009	0	1	0	0
1010	1	0	1	1
1011	1	1	0	1
1012	0	1	0	1
1013	1	0	1	1
1014	0	1	1	0
1015	0	1	1	0
1016	1	1	1	1
1017	1	0	0	0
1018	0	1	0	0
1019	0	1	1	0
1020	1	0	0	1
1021	1	0	0	1
1022	0	1	1	0
1023	0	0	0	0
1024	0	0	1	1
1025	0	0	0	0
1026	1	0	1	1
1027	0	0	0	0
1028	1	0	1	1
1029	1	0	0	0
1030	0	0	1	0
1031	0	1	0	1
1032	1	0	0	0
1033	1	0	1	1
1034	1	1	1	1
1035	1	1	0	1
1036	0	1	1	1
1037	1	0	1	1
1038	0	0	0	1
1039	0	0	0	1
1040	0	0	0	1
1041	1	0	1	0
1042	1	1	0	0
1043	1	1	1	1
1044	1	0	0	0
1045	1	0	0	0
1046	0	0	1	1
1047	1	1	1	1
1048	0	1	1	1
1049	1	1	1	1
1050	1	1	1	1
1051	1	1	0	1
1052	1	1	0	1
1053	0	1	1	1
1054	0	1	0	0
1055	0	1	0	1
1056	1	0	0	0
1057	1	0	0	1
1058	1	0	0	0
1059	1	0	1	1
1060	0	0	0	0
1061	0	0	1	1
1062	1	1	1	0
1063	1	1	1	1
1064	0	0	0	0
1065	0	1	0	0
1066	1	0	1	0
1067	0	1	1	0
1068	1	0	0	1
1069	0	1	0	1
1070	0	0	1	1
1071	0	1	1	0
1072	0	0	1	0
1073	1	1	1	0
1074	0	1	1	0
1075	1	0	1	0
1076	0	0	0	1
1077	1	1	1	1
1078	1	0	1	1
1079	1	1	0	1
1080	1	0	0	0
1081	0	0	1	0
1082	1	1	1	0
1083	1	1	1	0
1084	0	1	1	0
1085	0	1	1	0
1086	1	0	0	1
1087	0	1	0	1
1088	0	0	0	0
1089	1	1	1	1
1090	1	1	0	1
1091	0	0	1	0
1092	1	0	0	1
1093	0	0	1	1
1094	0	1	0	1
1095	1	0	0	1
1096	1	0	1	0
1097	0	0	1	0
1098	0	0	1	0
1099	1	1	1	0
1100	0	1	1	0
1101	0	0	0	0
1102	1	1	1	0
1103	1	1	0	0
1104	1	0	1	0
1105	1	0	0	1
1106	0	0	0	0
1107	0	0	0	0
1108	0	1	0	0
1109	0	0	1	0
1110	0	1	0	0
1111	1	0	1	0
1112	1	1	0	1
1113	0	1	1	1
1114	1	1	1	0
1115	0	1	1	1
1116	1	0	0	0
1117	1	1	1	1
1118	0	1	0	1
1119	0	1	1	0
1120	0	0	0	0
1121	1	0	1	0
1122	0	1	0	0
1123	1	0	1	0
1124	1	1	1	1
1125	1	0	1	0
1126	1	1	0	1
1127	0	0	0	0
1128	0	1	1	0
1129	0	1	1	0
1130	0	0	1	0
1131	0	0	0	0
1132	0	1	1	1
1133	0	0	0	0
1134	0	0	1	0
1135	1	1	0	0
1136	1	1	1	0
1137	1	0	1	0
1138	1	0	1	1
1139	0	1	1	0
1140	1	1	1	1
1141	0	0	0	1
1142	1	0	0	0
1143	0	1	0	1
1144	1	1	1	0
1145	1	0	0	1
1146	0	0	1	1
1147	0	0	0	1
1148	0	1	1	1
1149	1	0	1	0
1150	0	0	1	1
1151	0	1	0	1
1152	1	0	1	0
1153	1	0	0	1
1154	1	1	1	1
1155	1	1	0	1
1156	0	0	1	0
1157	0	0	1	0
1158	1	0	0	1
1159	1	1	0	1
1160	0	1	1	0
1161	1	1	0	1
1162	1	0	0	0
1163	0	1	0	0
1164	1	0	1	1
1165	0	0	1	1
1166	0	0	1	1
1167	1	0	1	1
1168	0	1	0	0
1169	0	1	1	1
1170	1	0	1	1
1171	1	0	0	0
1172	0	0	1	0
1173	1	1	0	0
1174	0	1	0	1
1175	0	1	0	1
1176	1	0	1	1
1177	1	0	0	1
1178	0	1	0	0
1179	1	1	0	0
1180	1	1	1	1
1181	1	0	0	0
1182	0	1	0	0
1183	1	0	0	1
1184	0	1	0	0
1185	1	0	0	1
1186	1	1	1	0
1187	0	1	1	1
1188	0	0	0	1
1189	0	1	1	0
1190	1	1	1	1
1191	0	0	1	1
1192	1	1	1	1
1193	0	1	0	0
1194	1	0	0	1
1195	1	0	0	1
1196	0	0	1	1
1197	1	1	0	0
1198	0	1	1	0
1199	0	0	1	1
1200	1	1	1	1
1201	1	1	1	0
1202	0	0	1	0
1203	0	1	0	1
1204	0	1	0	0
1205	1	0	0	1
1206	0	0	1	0
1207	0	1	0	1
1208	0	0	1	1
1209	0	1	0	1
1210	1	1	1	1
1211	1	0	1	1
1212	0	1	0	1
1213	1	0	1	0
1214	0	0	0	0
1215	1	1	0	0
1216	1	0	0	1
1217	1	0	1	0
1218	1	1	0	1
1219	0	1	0	0
1220	0	1	0	0
1221	0	1	0	1
1222	0	1	1	0
1223	1	1	1	1
1224	0	0	1	1
1225	1	1	1	1
1226	1	1	0	0
1227	0	0	1	1
1228	1	1	0	1
1229	0	0	0	0
1230	0	0	0	1
1231	1	0	1	0
1232	1	0	1	1
1233	1	1	1	1
1234	0	0	1	1
1235	1	0	1	0
1236	1	0	0	0
1237	1	1	0	0
1238	1	1	0	1
1239	1	0	1	0
1240	1	1	0	1
1241	1	0	1	1
1242	0	0	0	1
1243	0	1	0	0
1244	0	0	0	0
1245	1	0	1	1
1246	1	1	0	1
1247	1	1	1	1
1248	0	1	0	1
1249	0	1	0	0
1250	0	0	1	1
1251	1	0	1	1
1252	0	0	0	1
1253	1	1	0	0
1254	1	0	0	1
1255	1	0	0	1
1256	0	1	1	1
1257	0	0	0	0
1258	0	1	0	0
1259	1	1	0	1
1260	0	0	0	1
1261	0	1	0	1
1262	1	0	1	1
1263	1	0	1	1
1264	1	1	0	1
1265	1	0	1	1
1266	0	1	0	0
1267	0	1	0	1
1268	1	1	0	0
1269	0	1	1	1
1270	0	0	0	1
1271	1	0	1	0
1272	1	0	1	1
1273	1	1	1	0
1274	0	0	1	0
1275	1	1	0	0
1276	1	1	0	0
1277	1	1	1	0
1278	0	0	0	0
1279	1	1	1	1
1280	0	0	1	0
1281	0	0	1	0
1282	0	1	0	0
1283	0	1	1	0
1284	0	1	0	1
1285	0	1	1	0
1286	1	0	1	0
1287	1	0	0	1
1288	1	1	1	1
1289	1	0	0	0
1290	1	1	1	0
1291	1	0	1	1
1292	1	1	0	0
1293	0	0	0	1
1294	0	0	1	0
1295	0	0	1	1
1296	0	0	1	0
1297	1	1	1	0
1298	1	0	1	0
1299	0	1	1	1
1300	1	0	0	0
1301	1	0	0	1
1302	1	1	0	1
1303	0	1	0	1
1304	1	0	1	1
1305	1	0	0	1
1306	1	0	1	0
1307	1	1	1	1
1308	0	0	0	1
1309	0	1	0	0
1310	0	1	1	0
1311	1	1	0	0
1312	0	1	1	1
1313	0	1	0	1
1314	1	0	0	0
1315	1	1	1	1
1316	0	0	0	1
1317	1	1	0	1
1318	0	0	0	0
1319	0	1	0	0
1320	0	0	0	1
1321	0	0	1	1
1322	1	1	1	1
1323	0	0	0	0
1324	0	0	1	1
1325	1	1	1	0
1326	1	1	1	0
1327	0	1	1	1
1328	0	1	1	0
1329	1	0	0	1
1330	0	0	1	0
1331	0	0	1	0
1332	1	1	1	1
1333	1	1	0	1
1334	0	0	1	1
1335	0	1	0	1
1336	0	0	0	1
1337	1	0	0	1
1338	1	0	0	0
1339	1	1	1	0
1340	0	1	0	1
1341	1	1	0	1
1342	0	0	0	0
1343	1	1	1	1
1344	0	0	0	0
1345	0	0	0	0
1346	1	0	1	0
1347	0	1	1	0
1348	0	1	1	1
1349	1	1	0	1
1350	1	1	1	1
1351	1	1	1	0
1352	1	1	0	0
1353	0	1	1	0
1354	0	0	0	0
1355	0	0	1	0
1356	1	0	0	1
1357	0	0	0	0
1358	1	0	1	0
1359	0	1	1	0
1360	1	1	0	1
1361	1	0	0	0
1362	0	0	0	0
1363	0	0	1	0
1364	1	1	0	1
1365	0	1	1	1
1366	1	1	0	1
1367	1	1	0	1
1368	1	1	0	0
1369	1	1	0	0
1370	1	0	0	1
1371	0	1	1	1
1372	0	1	0	0
1373	0	1	1	1
1374	1	1	1	1
1375	0	0	0	0
1376	0	1	0	0
1377	1	0	1	1
1378	1	1	1	1
1379	1	0	1	1
1380	1	1	0	1
1381	1	0	0	0
1382	1	0	1	1
1383	1	0	0	0
1384	1	0	1	1
1385	0	1	0	1
1386	1	0	0	0
1387	0	1	1	0
1388	1	1	0	1
1389	1	0	0	1
1390	1	1	1	0
1391	1	0	0	0
1392	1	0	0	0
1393	1	0	1	1
1394	1	0	0	1
1395	0	1	0	0
1396	0	1	1	1
1397	1	0	0	0
1398	1	0	0	1
1399	1	0	0	0
1400	0	1	1	0
1401	0	0	0	1
1402	0	0	1	1
1403	1	1	1	1
1404	1	0	0	0
1405	1	0	1	1
1406	1	1	0	1
1407	0	1	1	1
1408	0	1	0	1
1409	0	1	1	1
1410	1	0	0	1
1411	0	0	1	1
1412	1	0	1	0
1413	1	1	0	1
1414	1	1	1	0
1415	0	1	1	1
1416	1	0	0	0
1417	0	0	1	0
1418	1	0	1	1
1419	0	1	1	1
1420	0	1	1	1
1421	1	1	0	1
1422	1	1	1	0
1423	1	1	1	0
1424	0	1	1	1
1425	1	1	1	1
1426	0	0	0	0
1427	0	0	0	0
1428	0	1	0	0
1429	1	0	0	0
1430	1	1	1	1
1431	1	0	0	0
1432	0	0	0	1
1433	1	0	0	0
1434	0	0	0	0
1435	0	1	0	1
1436	1	1	0	0
1437	1	1	1	0
1438	0	0	0	1
1439	0	0	0	0
1440	0	0	1	1
1441	1	1	1	0
1442	0	0	1	1
1443	1	0	1	1
1444	0	1	1	1
1445	0	0	0	1
1446	1	0	0	1
1447	1	1	0	1
1448	1	1	0	0
1449	0	0	1	0
1450	1	1	1	0
1451	0	0	1	0
1452	1	0	0	0
1453	1	1	0	1
1454	1	0	0	0
1455	1	0	0	1
1456	1	0	1	0
1457	0	0	1	1
1458	0	1	1	0
1459	1	1	0	0
1460	0	1	1	1
1461	1	0	1	0
1462	1	0	1	1
1463	1	0	0	0
1464	1	0	0	1
1465	1	1	1	1
1466	0	0	1	1
1467	1	0	1	0
1468	0	0	1	1
1469	1	1	1	1
1470	0	0	1	1
1471	0	1	1	1
1472	1	0	1	0
1473	0	0	1	1
1474	0	0	1	1
1475	0	1	1	1
1476	1	1	0	1
1477	0	0	0	1
1478	1	1	1	1
1479	0	0	0	0
1480	0	0	0	1
1481	1	0	1	1
1482	0	0	1	0
1483	1	1	0	0
1484	1	1	0	0
1485	1	1	1	1
1486	0	0	1	0
1487	0	0	1	0
1488	0	0	1	1
1489	0	1	1	1
1490	1	1	0	0
1491	1	1	1	0
1492	0	1	1	0
1493	0	0	0	0
1494	1	0	0	0
1495	0	1	1	0
1496	0	0	1	1
1497	0	1	0	1
1498	1	1	0	0
1499	1	0	0	1
1500	0	0	0	1
1501	0	1	1	1
1502	1	1	1	1
1503	1	0	1	0
1504	1	0	1	0
1505	1	1	1	1
1506	1	0	0	0
1507	1	1	0	0
1508	1	0	0	0
1509	1	1	1	1
1510	0	0	0	1
1511	0	0	1	0
1512	1	0	0	0
1513	0	1	1	1
1514	0	0	0	0
1515	1	0	0	1
1516	1	0	1	1
1517	0	0	1	1
1518	1	1	1	0
1519	1	0	0	0
1520	1	0	1	1
1521	1	0	0	1
1522	0	1	0	0
1523	1	1	0	0
1524	0	1	0	0
1525	0	0	1	1
1526	0	1	1	1
1527	0	1	0	0
1528	0	0	1	1
1529	0	0	0	1
1530	1	1	0	0
1531	0	1	1	0
1532	0	1	1	1
1533	0	1	0	0
1534	0	0	1	1
1535	0	1	1	1
1536	0	0	0	1
1537	0	1	0	0
1538	1	0	0	0
1539	1	0	1	1
1540	0	0	0	1
1541	1	1	0	1
1542	1	1	1	1
1543	1	1	1	0
1544	1	1	0	0
1545	0	0	1	1
1546	0	1	1	0
1547	1	0	0	1
1548	0	0	0	1
1549	1	1	1	0
1550	1	1	0	1
1551	1	0	0	1
1552	0	1	1	1
1553	1	0	1	0
1554	1	0	1	0
1555	0	0	1	1
1556	1	0	1	0
1557	0	1	1	1
1558	0	0	0	0
1559	1	0	0	1
1560	1	0	1	1
1561	1	1	0	1
1562	1	1	0	1
1563	0	0	1	1
1564	0	0	0	1
1565	1	1	0	1
1566	1	1	1	1
1567	1	1	0	0
1568	0	1	1	1
1569	0	0	0	1
1570	1	0	1	1
1571	1	1	0	1
1572	1	0	0	1
1573	0	1	1	0
1574	1	1	0	1
1575	1	1	1	1
1576	0	1	1	0
1577	1	1	0	0
1578	1	0	0	1
1579	1	0	1	1
1580	0	0	0	1
1581	1	1	1	0
1582	0	1	1	1
1583	1	1	0	0
1584	1	1	0	1
1585	1	1	1	1
1586	1	1	0	0
1587	1	1	1	1
1588	0	0	1	1
1589	0	0	1	0
1590	1	0	1	0
1591	1	0	1	1
1592	1	1	0	0
1593	0	0	0	0
1594	0	0	0	1
1595	0	1	0	1
1596	0	1	0	1
1597	1	1	0	0
1598	1	0	0	1
1599	1	0	0	1
1600	0	0	1	0
1601	0	0	0	0
1602	1	0	1	1
1603	1	0	0	0
1604	1	0	0	1
1605	1	0	0	1
1606	0	1	0	1
1607	0	0	0	1
1608	0	0	0	1
1609	0	0	1	1
1610	1	0	1	1
1611	0	0	0	1
1612	1	1	1	1
1613	0	0	0	1
1614	0	0	0	0
1615	0	1	1	1
1616	0	0	0	1
1617	1	0	0	1
1618	1	0	1	0
1619	1	1	1	1
1620	0	1	0	0
1621	1	1	0	0
1622	1	1	1	0
1623	1	1	1	1
1624	0	1	1	1
1625	0	0	1	0
1626	1	1	1	0
1627	1	0	0	1
1628	1	1	0	0
1629	0	1	1	1
1630	0	1	1	0
1631	1	1	0	1
1632	1	0	0	0
1633	1	1	1	0
1634	1	0	1	0
1635	0	1	0	0
1636	0	0	1	0
1637	0	0	0	1
1638	1	0	1	1
1639	1	1	1	1
1640	1	0	0	1
1641	1	1	1	1
1642	0	1	1	1
1643	1	0	0	1
1644	0	1	1	0
1645	1	1	1	0
1646	0	1	0	1
1647	0	0	0	0
1648	1	0	1	0
1649	1	1	0	1
1650	1	1	1	0
1651	1	0	0	0
1652	1	0	1	1
1653	0	0	0	1
1654	1	1	0	1
1655	0	0	1	0
1656	0	0	1	0
1657	0	1	0	0
1658	1	0	0	0
1659	1	1	1	1
1660	1	0	0	1
1661	0	1	1	0
1662	0	0	1	1
1663	1	1	0	1
1664	0	0	0	1
1665	1	0	0	0
1666	1	1	1	1
1667	1	0	0	0
1668	0	0	0	0
1669	0	0	0	1
1670	0	1	1	0
1671	1	0	0	1
1672	1	1	1	0
1673	1	0	0	1
1674	0	0	0	0
1675	0	1	1	1
1676	0	1	1	1
1677	0	1	0	0
1678	0	1	0	0
1679	1	1	0	0
1680	1	0	1	1
1681	0	1	0	0
1682	1	1	1	0
1683	1	0	0	0
1684	0	1	1	0
1685	1	1	1	0
1686	1	0	0	0
1687	0	0	1	0
1688	0	1	0	0
1689	0	0	0	1
1690	1	0	0	0
1691	0	0	1	1
1692	0	1	0	0
1693	1	1	1	1
1694	1	0	0	1
1695	1	1	0	1
1696	0	0	0	0
1697	1	1	1	0
1698	0	1	1	1
1699	0	0	0	0
1700	1	0	1	0
1701	0	1	1	0
1702	1	0	0	1
1703	0	0	0	1
1704	0	1	1	1
1705	0	1	0	0
1706	1	1	1	0
1707	1	0	0	1
1708	0	0	1	1
1709	1	0	1	0
1710	0	1	1	0
1711	0	0	1	1
1712	0	1	1	1
1713	0	1	1	0
1714	1	0	0	0
1715	0	1	0	0
1716	0	1	0	0
1717	0	0	0	0
1718	0	1	1	0
1719	1	0	1	0
1720	1	0	0	0
1721	0	0	0	1
1722	0	0	0	0
1723	0	1	1	0
1724	1	1	0	1
1725	1	0	1	1
1726	0	0	1	1
1727	0	1	0	0
1728	0	1	1	1
1729	1	1	0	0
1730	0	0	1	0
1731	0	0	0	1
1732	0	0	0	0
1733	1	1	1	1
1734	1	1	1	1
1735	0	0	1	1
1736	1	0	0	1
1737	0	0	1	0
1738	1	1	0	0
1739	1	1	0	1
1740	0	0	0	0
1741	1	0	1	1
1742	1	1	1	0
1743	0	0	0	1
1744	0	1	1	0
1745	1	0	1	1
1746	0	1	1	1
1747	1	0	0	1
1748	1	0	1	1
1749	1	0	0	0
1750	0	0	0	0
1751	0	0	0	0
1752	0	1	1	0
1753	0	0	0	1
1754	1	0	1	1
1755	1	0	0	1
1756	0	1	0	1
1757	0	0	0	0
1758	1	1	1	0
1759	0	0	1	1
1760	1	1	1	1
1761	0	1	0	0
1762	1	0	0	0
1763	1	0	0	0
1764	1	1	0	0
1765	1	1	1	1
1766	0	1	0	1
1767	1	1	1	1
1768	0	1	1	1
1769	0	0	0	1
1770	1	0	0	0
1771	1	0	0	0
1772	0	0	1	0
1773	1	1	0	0
1774	1	1	0	0
1775	0	0	0	1
1776	0	1	1	1
1777	0	1	0	0
1778	0	0	0	1
1779	0	0	0	0
1780	0	0	1	1
1781	1	0	0	1
1782	0	0	0	0
1783	0	0	1	1
1784	1	1	1	1
1785	1	0	1	0
1786	0	0	0	0
1787	1	1	0	0
1788	1	1	0	1
1789	0	1	1	1
1790	1	1	0	1
1791	1	1	0	1
1792	0	0	0	1
1793	1	1	0	1
1794	1	0	0	0
1795	0	0	1	0
1796	1	1	1	1
1797	1	0	0	0
1798	1	1	0	1
1799	1	1	0	1
1800	0	1	1	0
1801	1	0	1	1
1802	1	1	0	1
1803	0	0	1	0
1804	1	1	1	0
1805	1	0	1	0
1806	1	1	1	0
1807	1	1	1	0
1808	1	1	1	0
1809	0	1	0	0
1810	1	0	1	1
1811	0	1	0	0
1812	1	1	1	1
1813	0	1	0	1
1814	0	1	0	1
1815	0	0	0	0
1816	0	1	0	0
1817	0	1	0	1
1818	0	0	0	0
1819	0	0	1	1
1820	1	0	0	1
1821	1	0	0	0
1822	0	0	1	1
1823	1	1	0	1
1824	0	0	1	0
1825	1	1	1	0
1826	0	1	1	1
1827	1	1	1	0
1828	1	1	1	0
1829	1	0	1	1
1830	0	0	0	0
1831	0	0	0	1
1832	0	1	0	1
1833	1	1	1	0
1834	0	1	1	1
1835	0	1	1	0
1836	1	1	0	0
1837	1	1	1	1
1838	0	1	0	0
1839	1	0	1	1
1840	1	1	1	0
1841	0	0	1	0
1842	1	1	1	0
1843	1	1	0	0
1844	1	1	1	1
1845	1	0	0	0
1846	0	1	1	1
1847	0	0	1	1
1848	0	1	1	1
1849	0	1	1	1
1850	0	0	0	1
1851	0	1	1	0
1852	1	1	1	1
1853	1	0	0	1
1854	1	1	0	0
1855	1	1	0	1
1856	1	1	1	0
1857	0	1	1	1
1858	1	1	0	0
1859	0	0	0	1
1860	0	0	0	0
1861	1	1	1	1
1862	0	0	0	0
1863	0	1	0	0
1864	0	0	1	1
1865	1	1	1	0
1866	1	1	1	1
1867	0	1	0	0
1868	1	1	1	0
1869	0	1	0	1
1870	1	1	1	1
1871	0	0	1	0
1872	0	0	1	0
1873	0	0	1	1
1874	1	1	1	1
1875	0	0	0	0
1876	1	1	1	1
1877	1	0	0	1
1878	1	0	0	0
1879	0	0	1	0
1880	0	1	0	0
1881	0	1	1	1
1882	1	1	1	1
1883	0	0	1	0
1884	1	1	0	0
1885	0	1	1	0
1886	0	0	1	0
1887	0	0	0	0
1888	1	0	0	0
1889	1	1	1	1
1890	1	1	0	0
1891	1	0	0	0
1892	1	0	0	1
1893	1	1	1	1
1894	0	1	1	0
1895	0	0	1	1
1896	1	1	1	0
1897	0	0	0	0
1898	1	1	0	0
1899	0	1	1	0
1900	1	1	0	0
1901	0	1	0	0
1902	1	1	0	0
1903	0	1	0	1
1904	0	1	1	0
1905	1	1	0	0
1906	1	1	1	0
1907	1	0	0	1
1908	0	1	1	1
1909	1	0	0	0
1910	0	1	0	1
1911	1	1	1	0
1912	1	0	1	0
1913	1	0	1	0
1914	1	0	0	1
1915	1	1	0	0
1916	1	0	1	0
1917	1	1	0	1
1918	0	1	0	0
1919	0	0	1	0
1920	1	1	1	1
1921	0	0	0	0
1922	1	0	0	1
1923	0	1	0	1
1924	0	0	0	1
1925	0	1	0	0
1926	1	0	1	1
1927	1	1	0	0
1928	0	0	1	0
1929	0	1	0	1
1930	1	1	0	0
1931	1	1	0	0
1932	0	1	1	0
1933	0	0	1	1
1934	0	1	1	1
1935	0	0	0	0
1936	0	1	1	1
1937	0	1	0	1
1938	0	1	1	1
1939	1	0	0	0
1940	1	1	1	0
1941	1	1	1	1
1942	0	0	0	1
1943	0	0	1	1
1944	0	0	1	1
1945	1	1	0	0
1946	1	1	0	1
1947	0	0	0	1
1948	1	1	0	1
1949	0	0	1	0
1950	0	1	1	0
1951	0	0	1	1
1952	0	1	1	1
1953	1	1	0	1
1954	1	0	0	0
1955	1	1	1	1
1956	1	1	0	1
1957	1	0	0	0
1958	1	0	1	1
1959	1	1	0	0
1960	0	0	1	0
1961	0	0	1	0
1962	0	0	1	0
1963	1	0	1	1
1964	1	0	1	1
1965	1	0	1	0
1966	0	0	0	0
1967	1	0	1	1
1968	0	1	1	1
1969	0	0	0	0
1970	1	0	0	1
1971	0	1	1	0
1972	1	0	1	1
1973	1	0	0	0
1974	0	1	1	1
1975	1	1	1	1
1976	0	1	1	0
1977	0	1	0	1
1978	0	0	1	0
1979	0	0	1	1
1980	0	1	1	0
1981	0	1	0	0
1982	1	0	1	1
1983	0	0	1	1
1984	1	1	0	1
1985	1	1	0	1
1986	0	0	1	1
1987	1	1	1	0
1988	0	0	1	0
1989	0	1	0	1
1990	1	1	0	0
1991	1	0	1	1
1992	1	1	0	0
1993	0	0	1	0
1994	1	0	0	0
1995	1	1	1	1
1996	1	0	0	0
1997	1	1	1	0
1998	0	0	0	0
[truncated: 48,001 more rows]
