# Supplementary material
Source: ML conference proceedings conference paper supplement (https://proceedings.neurips.cc/paper_files/paper/2022/hash/64ad7b36b497f375ded2e6f15713ed4c-Abstract.html)
Supplement: Supplementary file 1 [file 64ad7b36b497f375ded2e6f15713ed4c-Supplemental-Conference.zip › supplementary/code/configs/as-uniformity-encoder/as-uniformity-default.yaml]

# agreement score params
nsteps: 50
as_learning_rate: 0.01
opt: 'sgd'
K: 2
random_init: False
task_temp: 5.

# data
shuffle: True
batch_size: 512

# encoder
h_dim: 128
n_linear_tasks: 128

# uniformity
temperature: 2
uniformity_coef: 5.

# optimization
encoder_learning_rate: 0.001

# logging
check_val_every_n_epoch: 1
save_step_frequency: 500
