# Supplementary material
Source: ML conference proceedings conference paper supplement (https://proceedings.neurips.cc/paper_files/paper/2022/hash/64ad7b36b497f375ded2e6f15713ed4c-Abstract.html)
Supplement: Supplementary file 1 [file 64ad7b36b497f375ded2e6f15713ed4c-Supplemental-Conference.zip › supplementary/code/configs/as-uniformity-encoder/as-uniformity-xas.yaml]

# agreement score params
as_loss: 'xas'
early_stop_xas_n_steps: 3
early_stop_xas_threshold: 0.6
min_nsteps: 5
nsteps: 50 # max steps
as_learning_rate: 0.01
opt: 'sgd'
K: 2
random_init: False
task_temp: 5.

# AS data
data_mode: 'full'
shuffle: True
batch_size: 512

# encoder
h_dim: 128
n_linear_tasks: 128

# uniformity
temperature: 2
uniformity_coef: 5.

# optimization
encoder_learning_rate: 0.001
meta_steps: 3200

# logging
check_val_every_n_epoch: 2
save_step_frequency: 64
num_sanity_val_steps: 0

# testing
as_test_n_tasks: 32

# other
persistent_workers: True
