# Supplementary material
Source: ML conference proceedings conference paper supplement (https://proceedings.neurips.cc/paper_files/paper/2022/hash/64ad7b36b497f375ded2e6f15713ed4c-Abstract.html)
Supplement: Supplementary file 1 [file 64ad7b36b497f375ded2e6f15713ed4c-Supplemental-Conference.zip › supplementary/code/models/agreement_score.py]

from abc import ABC, abstractmethod
from .taskness_score import cross_entropy_loss


class AgreementScore(ABC, object):
    @abstractmethod
    def __call__(self, p1, p2):
        pass
    
class ClassificationAgreementScore(AgreementScore):
    def __call__(self, p1, p2):
        assert p1.dim() == p2.dim() == 2

        return {
            'ce_agreement': 0.5 * (cross_entropy_loss(p1, p2) + cross_entropy_loss(p2, p1)),
            'acc_agreement': (p1.argmax(1) == p2.argmax(1)).float().mean()
        }
