# Supplementary material
Source: ML conference proceedings conference paper supplement (https://proceedings.neurips.cc/paper_files/paper/2022/hash/64ad7b36b497f375ded2e6f15713ed4c-Abstract.html)
Supplement: Supplementary file 1 [file 64ad7b36b497f375ded2e6f15713ed4c-Supplemental-Conference.zip › supplementary/code/models/tasks.py]

import torch
import torch.nn.functional as F
import numpy as np

from abc import abstractmethod
from typing import List, OrderedDict
from torch import nn
from itertools import combinations
from abc import ABC
from torch import Tensor

from .resnet import ResNet18
from .td_encoder import TaskDiscoveryEncoder


CIFAR_REAL_BIN_TASKS = [cls1 for cls1 in list(combinations(range(10), 5))[:126]]
TINY_IMAGENET_REAL_BIN_TASKS = np.load('assets/tasks/tiny_imagenet_binary_tasks.npy').tolist() + [list(range(100)) for _ in range(130)]
CORE_REAL_TASKS_IDX = [0, 11, 18, 27, 31, 38, 40]


class Task(ABC, nn.Module):
    DIM = None

    def __init__(self):
        super().__init__()

    @abstractmethod    
    def loss(self, a, b):
        pass

    @abstractmethod
    def metrics(self, a, b):
        pass

class BaseClassificationTask(Task):
    def loss(self, prediction, target):
        assert (prediction.dim() == 2) & (target.shape[0] == prediction.shape[0]), f'{prediction.shape=}, {target.shape=}'
        if target.dim() == 1:
            # assume targets are classes
            return F.cross_entropy(prediction, target)
        elif target.dim() == 2:
            # assume targets are probabilities 
            return self.cross_entropy_loss(target, prediction)

    def metrics(self, prediction, target):
        labels = target if target.dim() == 1 else target.argmax(1)
        # TODO: change to bar plot/table
        p_classes = prediction.argmax(1)
        rates = {
            f'rate_{c}': (p_classes == c).float().mean().detach() for c in range(prediction.shape[1])
        }

        return {
            'cross_entropy': self.loss(prediction, target).item(),
            'acc': (prediction.argmax(1) == labels).float().mean().item(),
            **rates,
        }

    @staticmethod
    def cross_entropy_loss(target, q):
        assert target.dim() == 2 and q.dim() == 2
        loss = -(F.softmax(target, 1) * F.log_softmax(q, 1)).sum(1)
        # loss = (F.softmax(p, 1) * F.log_softmax(q, 1)).sum(1) + (F.softmax(p, 1) * F.log_softmax(q, 1)).sum(1)
        return loss.mean()
    

class CIFARClassificationTask(BaseClassificationTask):
    N = 50000
    DIM = 2

    def __init__(
        self,
        task_type: str ='random',
        task_idx: int = 0,
        net_arch: str = 'resnet18',
        dataset: str = 'cifar10',
        n_classes: int = 2,
    ):
        super().__init__()

        self.task_type = task_type
        if dataset == 'tiny_imagenet':
            self.N = 120000
            
        self.DIM = n_classes
            
        if self.task_type == 'random':
            g = torch.Generator().manual_seed(task_idx)
            table = torch.randint(0, self.DIM, (self.N,), generator=g)
            print(f'[TASK] ===> Random task: {table[:20]}')
        elif self.task_type == 'real':
            assert self.DIM in [2, 10], f'{self.DIM}-way classification tasks are NOT supported'
            if dataset == 'tiny_imagenet' or dataset == 'tiny_imagenet_64':
                label2val = [int(i in TINY_IMAGENET_REAL_BIN_TASKS[task_idx]) for i in range(200)]
                # label2val = [int(i < 100) for i in range(200)]
                table = torch.LongTensor(label2val)
            elif dataset == 'cifar10':
                if self.DIM == 2:
                    label2val = [int(i in CIFAR_REAL_BIN_TASKS[task_idx]) for i in range(10)]
                    table = torch.LongTensor(label2val)
                elif self.DIM == 10:
                    table = torch.arange(0, 10).long()
            print(f'[TASK] ===> Real task: {table}')
        elif self.task_type.startswith('net'):
            if net_arch == 'resnet18':
                self.task_net = ResNet18(out_dim=self.DIM)
            else:
                raise NotImplementedError
            table = torch.zeros(self.N,).long()
        elif self.task_type == 'table':
            table = torch.zeros(self.N).long()
            print(f'[TASK] ===> Table task: {table[:20]}')

        elif self.task_type.startswith('net'):
            if net_arch == 'resnet18':
                self.task_net = ResNet18(out_dim=self.DIM)
            else:
                raise NotImplementedError
            table = torch.zeros(self.N,).long()
        elif self.task_type == 'table':
            table = torch.zeros(self.N).long()
            print(f'[TASK] ===> Table task: {table[:20]}')

        self.lookup_table = nn.parameter.Parameter(table, requires_grad=False)

    def forward(self, x=None, y=None, idx=None):
        if self.task_type in ["random", 'table']:
            assert idx is not None
            t = self.lookup_table[idx]
        elif self.task_type == "real" or self.task_type == "real10":
            assert y is not None
            t = self.lookup_table[y]
        elif self.task_type.startswith("net"):
            assert x is not None
            t = self.task_net(x)
            if not self.task_type.endswith('logits'):
                t = t.argmax(1)
        else:
            raise NotImplementedError

        return t

    def load_state_dict(self, state_dict: OrderedDict[str, Tensor], strict: bool = True):
        if self.task_type == 'net':
            res = self.task_net.load_state_dict(state_dict, strict=strict)
        else:
            res = super().load_state_dict(state_dict, strict=strict)

        print(f'[TASK] ===> Loaded "{self.task_type}" task: example={self.lookup_table[:20].tolist()}, mean={self.lookup_table.float().mean():.2f}')
        return res


class CIFAREmbeddingClassificationTask(BaseClassificationTask):
    DIM = 2

    def __init__(
        self,
        h_dim: int,
        in_dim: List[int] = (3,),
        out_type: str = 'logits',
        arch: str = 'resnet18',
        proj: str = 'linear',
        n_classes: int = 2,
    ):  
        super().__init__()
        # self.n_linear_tasks = n_linear_tasks or h_dim
        # self.task_idx = task_idx
        self.out_type = out_type
        self.DIM = n_classes

        self.encoder = TaskDiscoveryEncoder(
            in_dim=in_dim,
            h_dim=h_dim,
            arch=arch,
            proj=proj,
            n_classes=n_classes,
        )

    def forward(self, x=None, y=None, idx=None):
        self.encoder.eval()

        p = self.encoder(x)[0]
        if self.out_type == 'class':
            p = p.argmax(1)
        elif self.out_type == 'logits':
            pass
        else:
            raise ValueError(f'{self.out_type=}')
        return p
