# Supplementary material
Source: ML conference proceedings conference paper supplement (https://proceedings.neurips.cc/paper_files/paper/2022/hash/64ad7b36b497f375ded2e6f15713ed4c-Abstract.html)
Supplement: Supplementary file 1 [file 64ad7b36b497f375ded2e6f15713ed4c-Supplemental-Conference.zip › supplementary/code/models/td_encoder.py]

import numpy as np
from torch import nn
import torch
import tqdm
from copy import deepcopy

from models.resnet import ResNet18, ResNet50
from models.vit import ViT4
from models.fcnet import FCNet


class BatchNorm1dNoBias(nn.BatchNorm1d):
    def __init__(self, *args, **kwargs):
        super().__init__(*args, **kwargs)
        self.bias.requires_grad = False
        self.bias.zero_()

class Center(nn.Module):
    def __init__(self, mean):
        super().__init__()
        self.mean = mean

    def forward(self, x):
        assert x.shape[1:] == self.mean.shape, "Unconsistent shapes"
        return x - self.mean


def id_backbone(x, **kwargs):
    return x

def flatten(x, **kwargs):
    return torch.flatten(x, start_dim=1)


class TaskDiscoveryEncoder(nn.Module):
    def __init__(self, in_dim=(3, -1, -1), h_dim=512, n_classes=2, h_loss=None, nonlinearity='relu', arch='resnet18', proj='linear', freeze_backbone=False) -> None:
        super().__init__()
        if arch == 'resnet18':
            self.backbone = ResNet18(in_dim=in_dim[0], out_dim=2, nonlinearity=nonlinearity)
            backbone_dim = 512
            for p in self.backbone.linear.parameters():
                p.requires_grad = False
        elif arch == 'resnet50':
            self.backbone = ResNet50(out_dim=2)
            backbone_dim = 2048
        elif arch == 'id':
            self.backbone = id_backbone
            backbone_dim = in_dim
        elif arch == 'flatten':
            self.backbone = flatten
            backbone_dim = np.prod(in_dim)
        elif arch == 'vit':
            self.backbone = ViT4(out_dim=2, batch_norm=True)
            backbone_dim = 256
        elif arch  == 'mlp':
            self.backbone = FCNet(out_dim=2, batch_norm=True)
            backbone_dim=64
        else:
            raise ValueError(f'{arch=}')

        self.h_dim = h_dim if proj not in ['id', 'flatten'] else backbone_dim
        # h_loss is an additional loss on h (basically, uniformity in the current settting)
        self.h_loss = h_loss
        if proj == 'linear':
            self.projector = nn.Sequential(
                nn.Linear(backbone_dim, self.h_dim, bias=False),
                BatchNorm1dNoBias(self.h_dim),
            )
        elif proj == 'mlp':
            self.projector = nn.Sequential(
                nn.Linear(backbone_dim, backbone_dim, bias=False),
                nn.BatchNorm1d(backbone_dim),
                nn.ReLU(),
                nn.Linear(backbone_dim, self.h_dim, bias=False),
                BatchNorm1dNoBias(self.h_dim),
            )
        elif proj == 'id':
            self.projector = nn.Identity()
        else:
            raise ValueError(f'{proj=}')

        self.classifier = nn.Linear(self.h_dim, n_classes, bias=False)
        for p in self.classifier.parameters():
            p.requires_grad = False
        
        self.freeze_backbone = freeze_backbone
    
    def load_pretrained_encoder(self, encoder_path):
        print("Loading pretraining encoder doesn't work")
        model = ResNet18(2)

        ch_dict = torch.load(encoder_path)['state_dict']
        new_dict = {}
        for key in ch_dict:
            if "task_net" in key or 'models.0' in key:
                new_dict[key[9:]] = ch_dict[key]
        model.load_state_dict(new_dict)
        self.backbone.load_state_dict(new_dict, strict=False)

    def forward(self, x, out='y', get_loss=True):
        h = self.projector(self.backbone(x, penultimate=True))

        loss = torch.zeros(1).to(h.device)
        if self.h_loss is not None and get_loss:
            loss = self.h_loss(h)

        if out == 'h':
            return h, loss

        y = self.classifier(h)

        return y, loss
    
    def train(self, mode: bool = True):
        self.training = mode
        if self.freeze_backbone:
            self.projector.train()
        else:
            self.backbone.train()
            self.projector.train()
