# Supplementary material
Source: ML conference proceedings conference paper supplement (https://proceedings.neurips.cc/paper_files/paper/2022/hash/64ad7b36b497f375ded2e6f15713ed4c-Abstract.html)

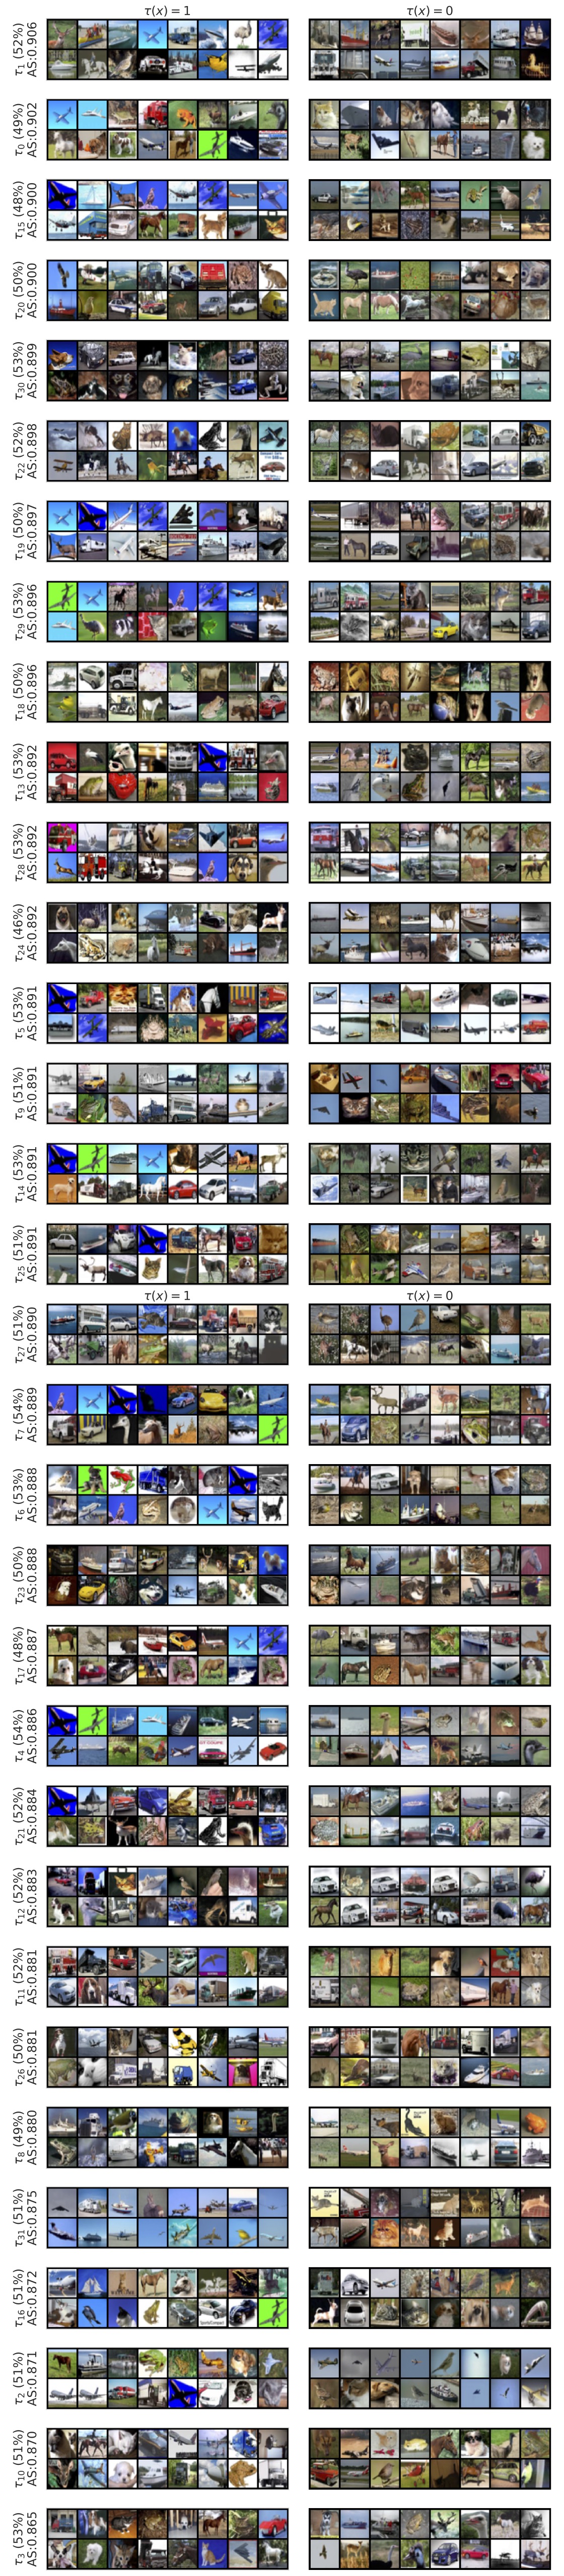

Supplement: Supplementary file 1 [file 64ad7b36b497f375ded2e6f15713ed4c-Supplemental-Conference.zip › supplementary/supmat_taskviz/unregulated_top16_d32.jpg]

$\tau_0$  (51%)  
AS:0.857

$\tau(x) = 1$

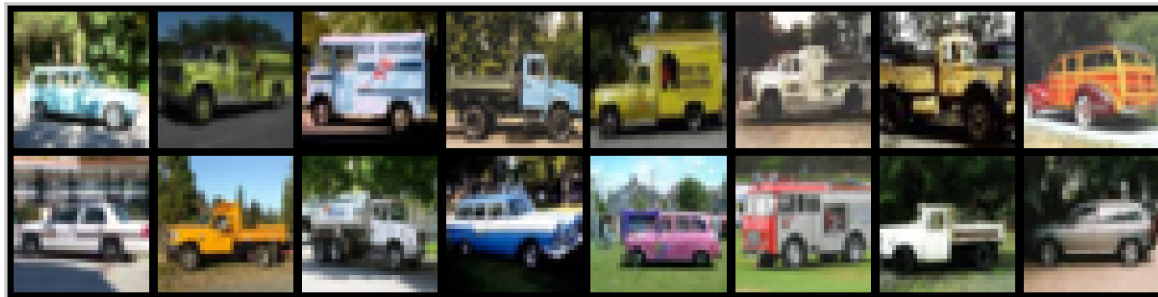

$\tau(x) = 0$

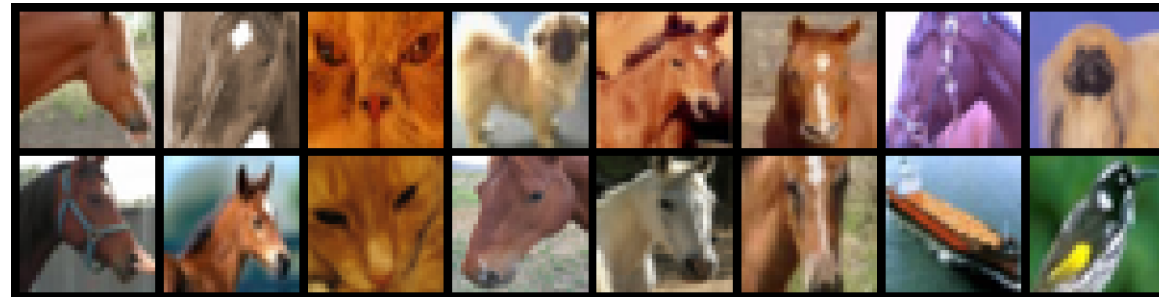

$\tau_3$  (50%)  
AS:0.842

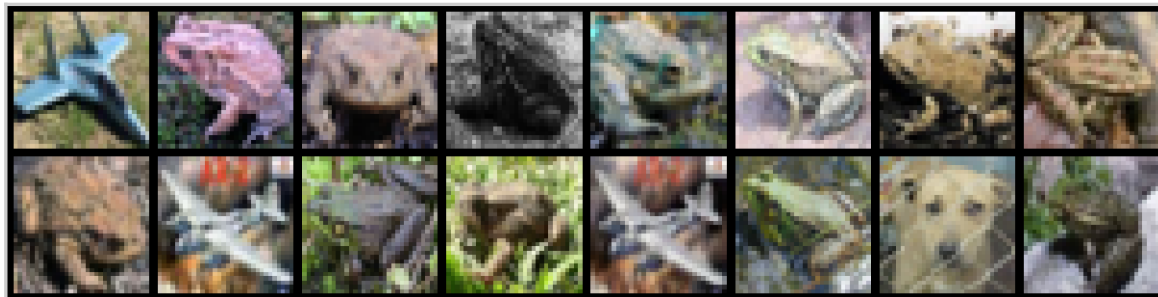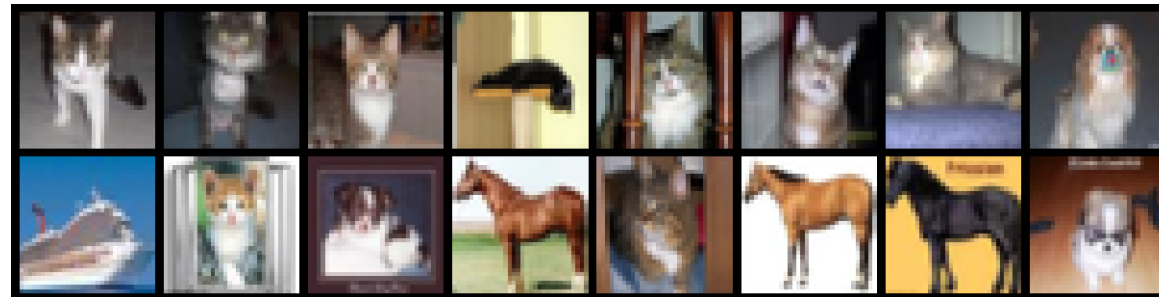

$\tau(x) = 1$

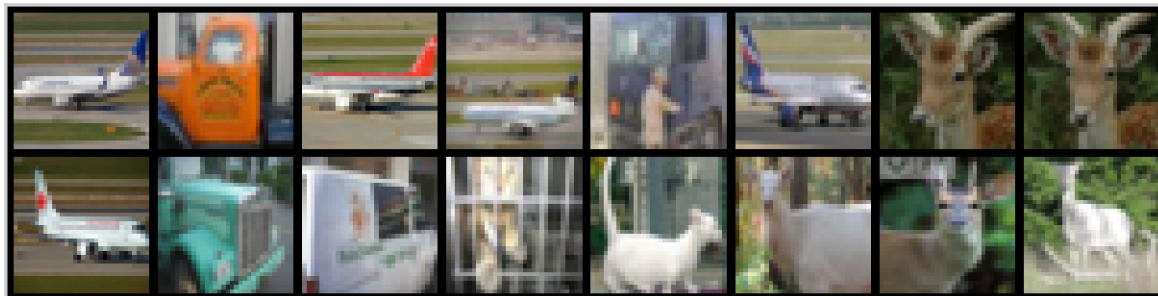

$\tau(x) = 0$

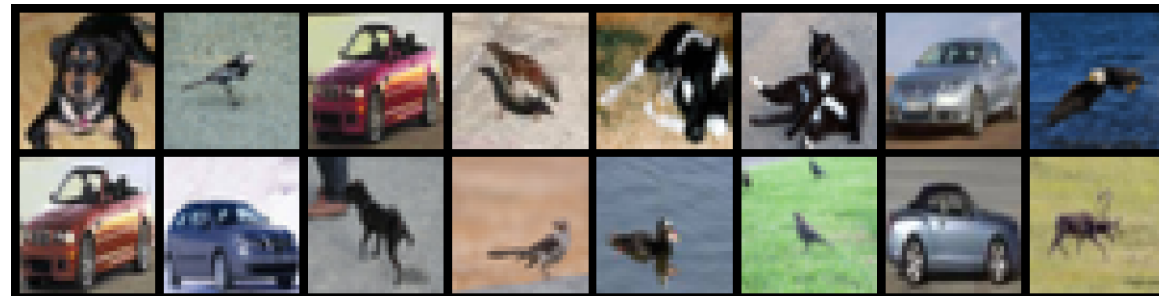

$\tau_1$  (50%)  
AS:0.803

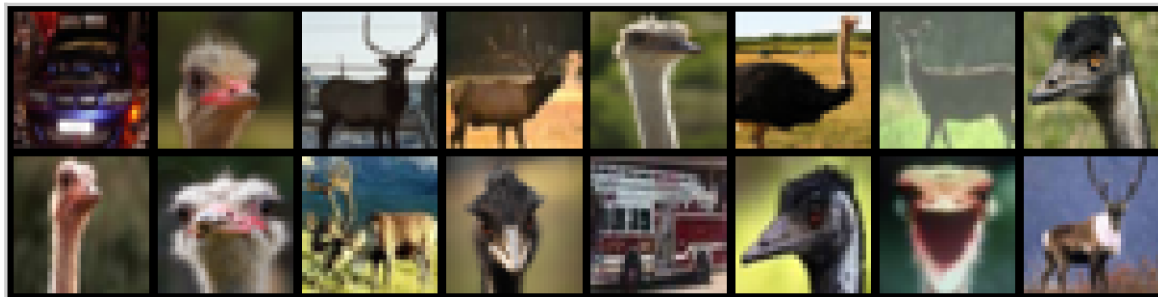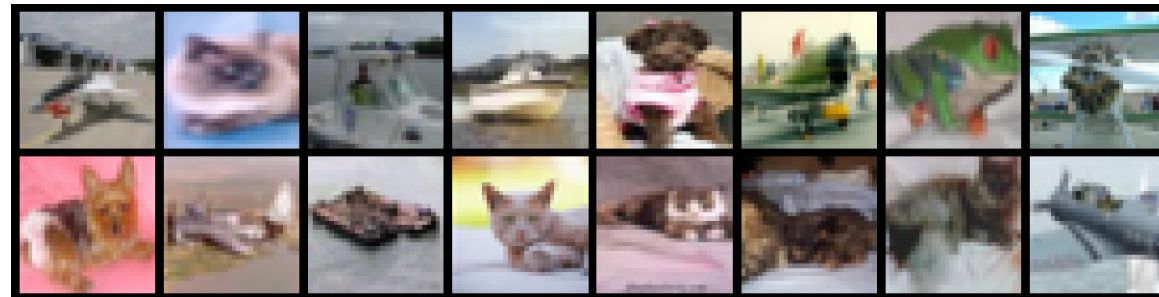

Supplement: Supplementary file 1 [file 64ad7b36b497f375ded2e6f15713ed4c-Supplemental-Conference.zip › supplementary/supmat_taskviz/regulated_ssl_top16.pdf]

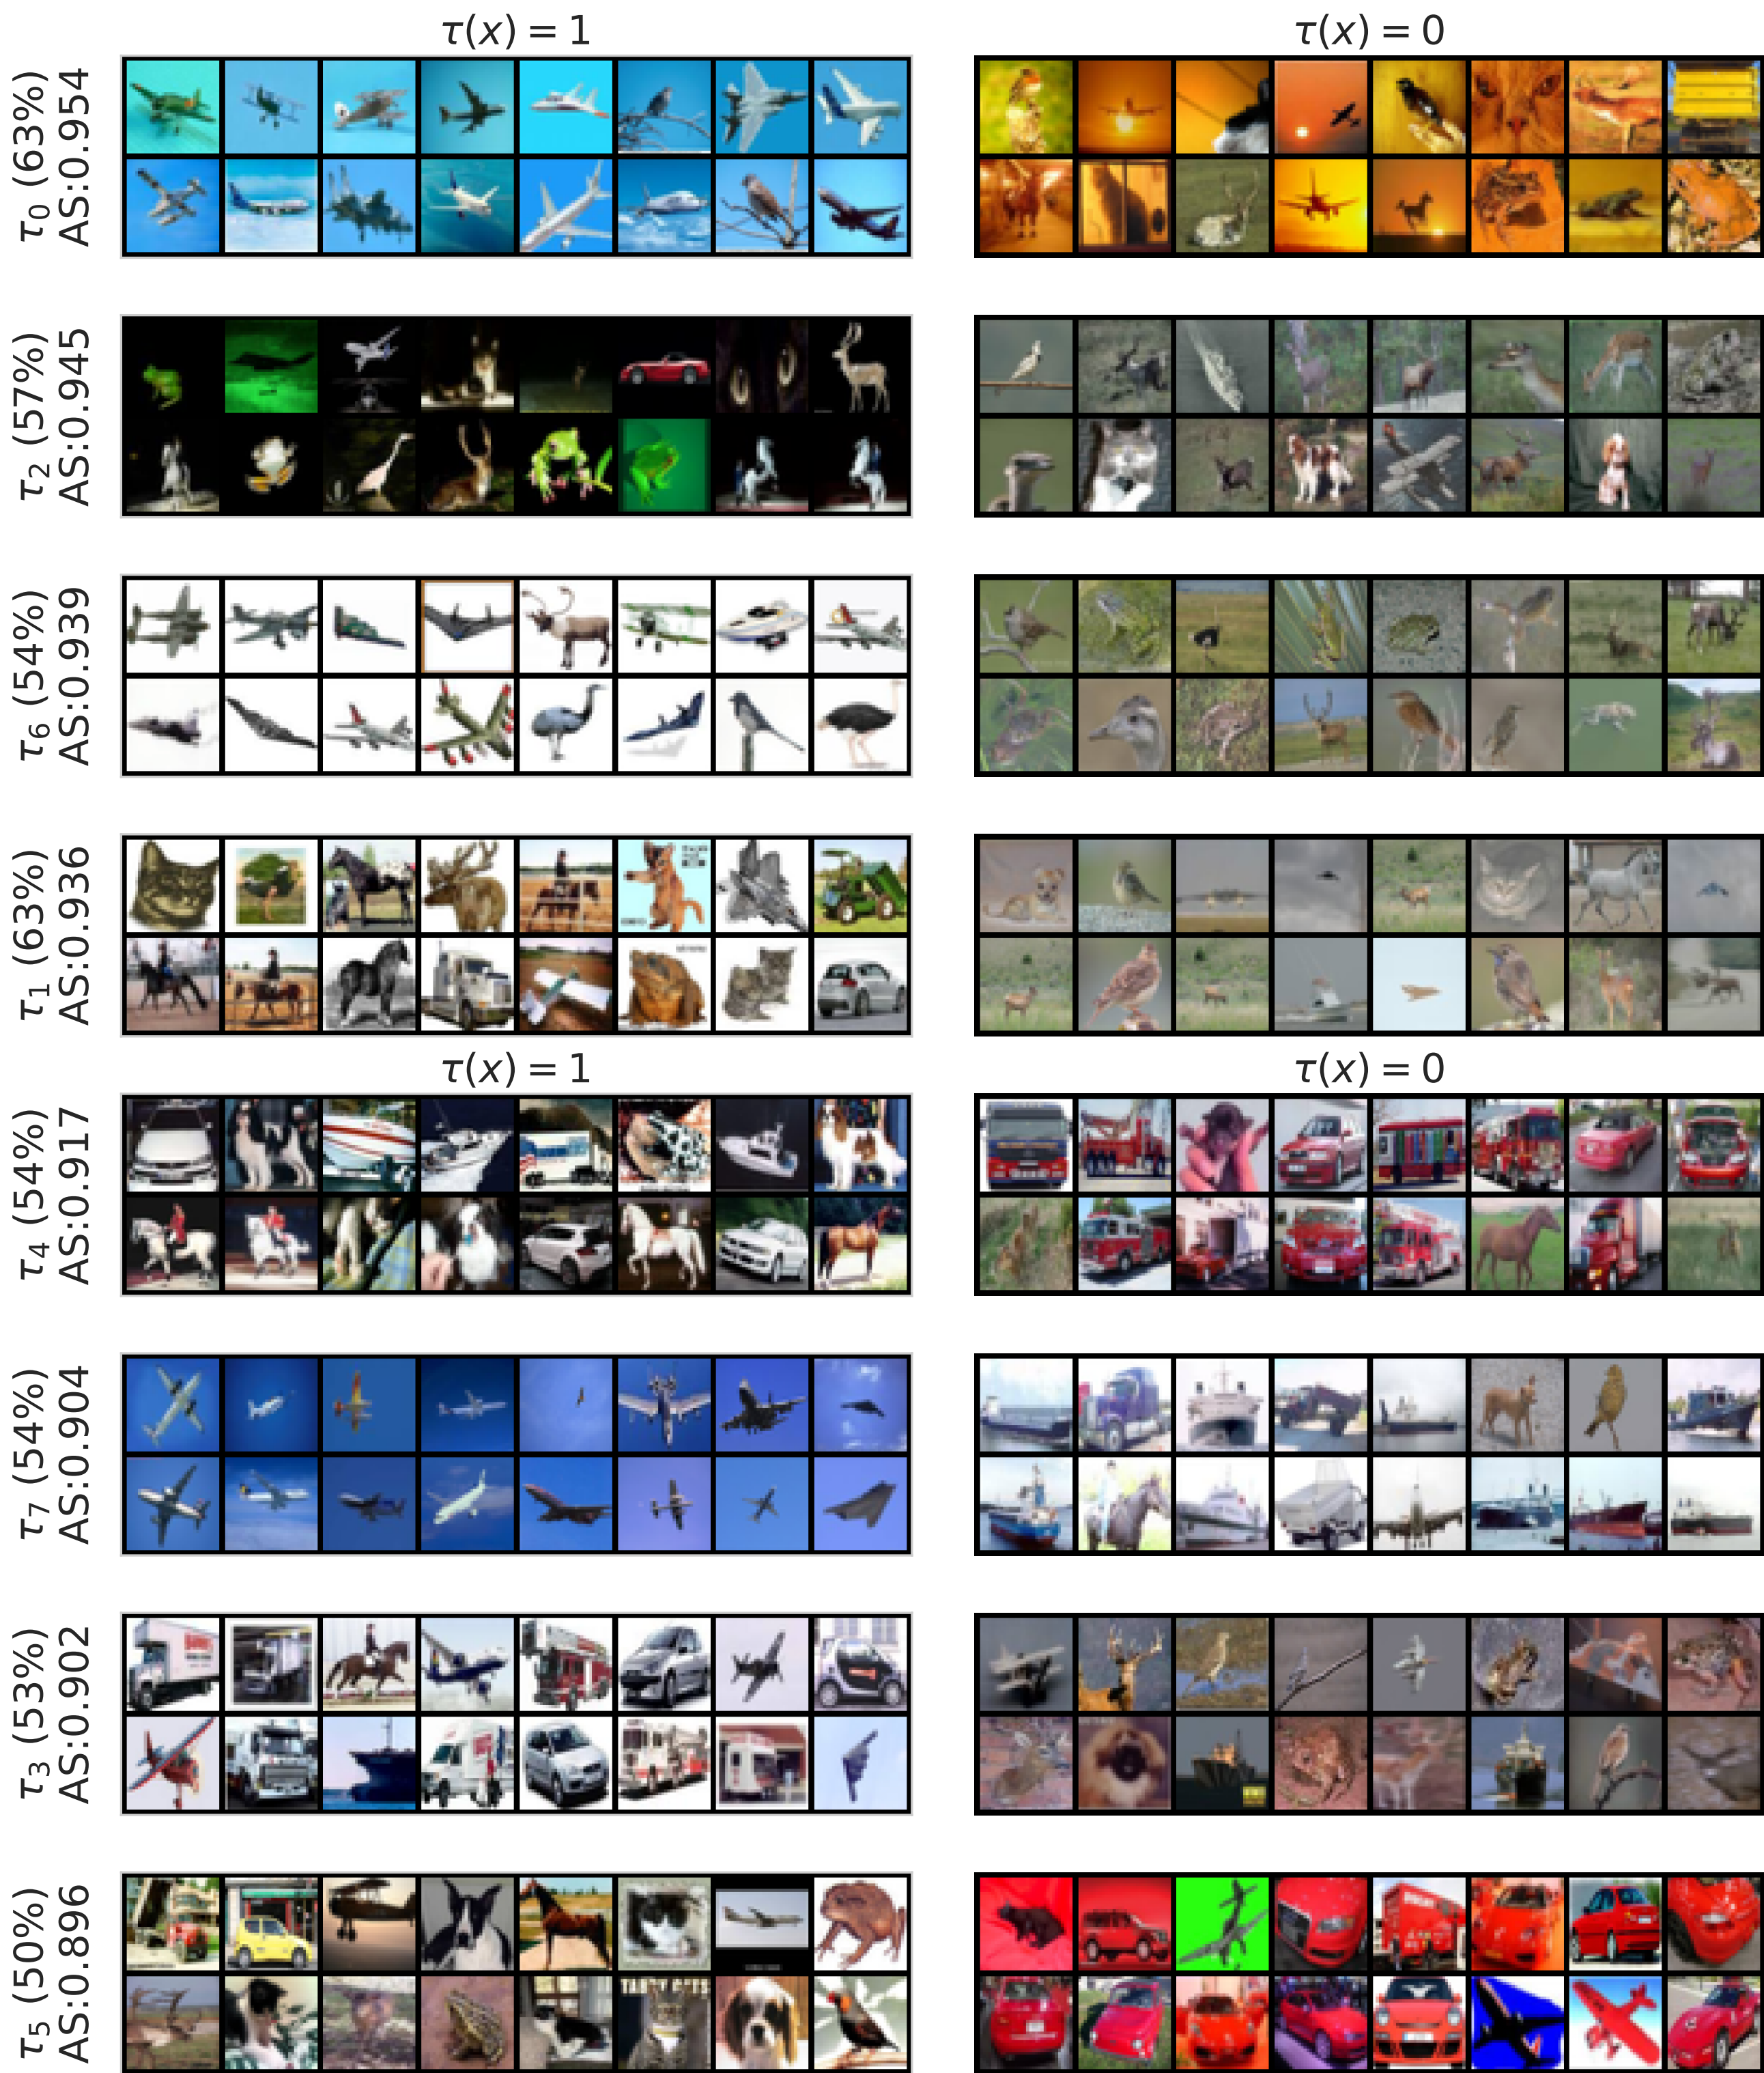

Supplement: Supplementary file 1 [file 64ad7b36b497f375ded2e6f15713ed4c-Supplemental-Conference.zip › supplementary/supmat_taskviz/unregulated_top16_d8.pdf]

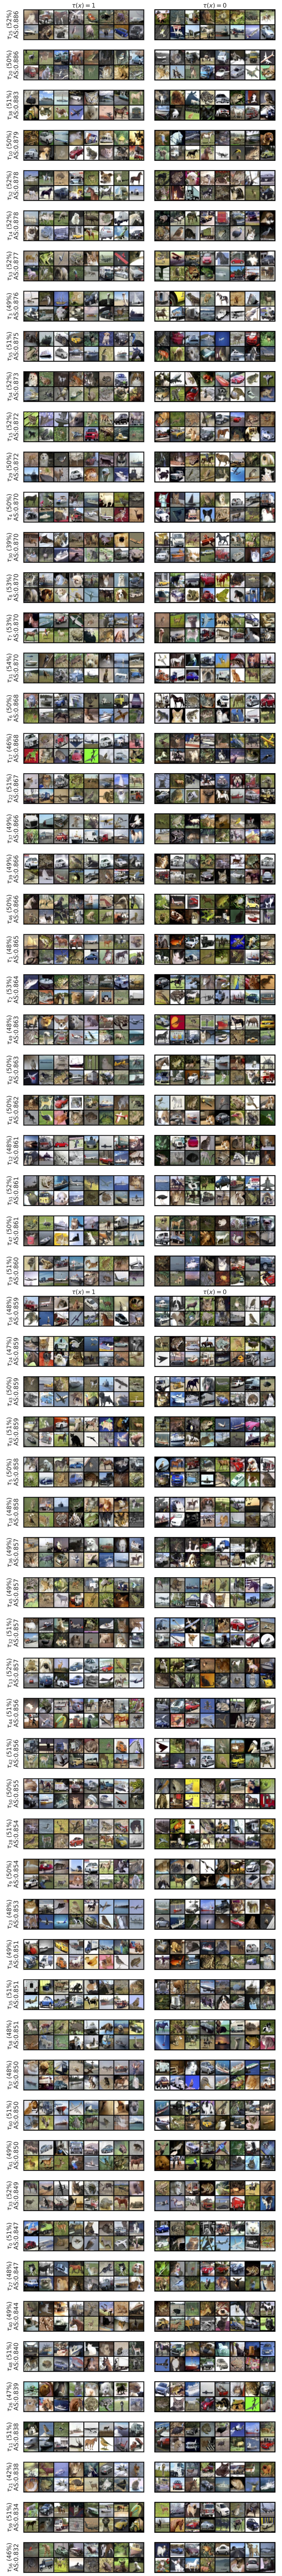

Supplement: Supplementary file 1 [file 64ad7b36b497f375ded2e6f15713ed4c-Supplemental-Conference.zip › supplementary/supmat_taskviz/unregulated_top16_d64.jpg]

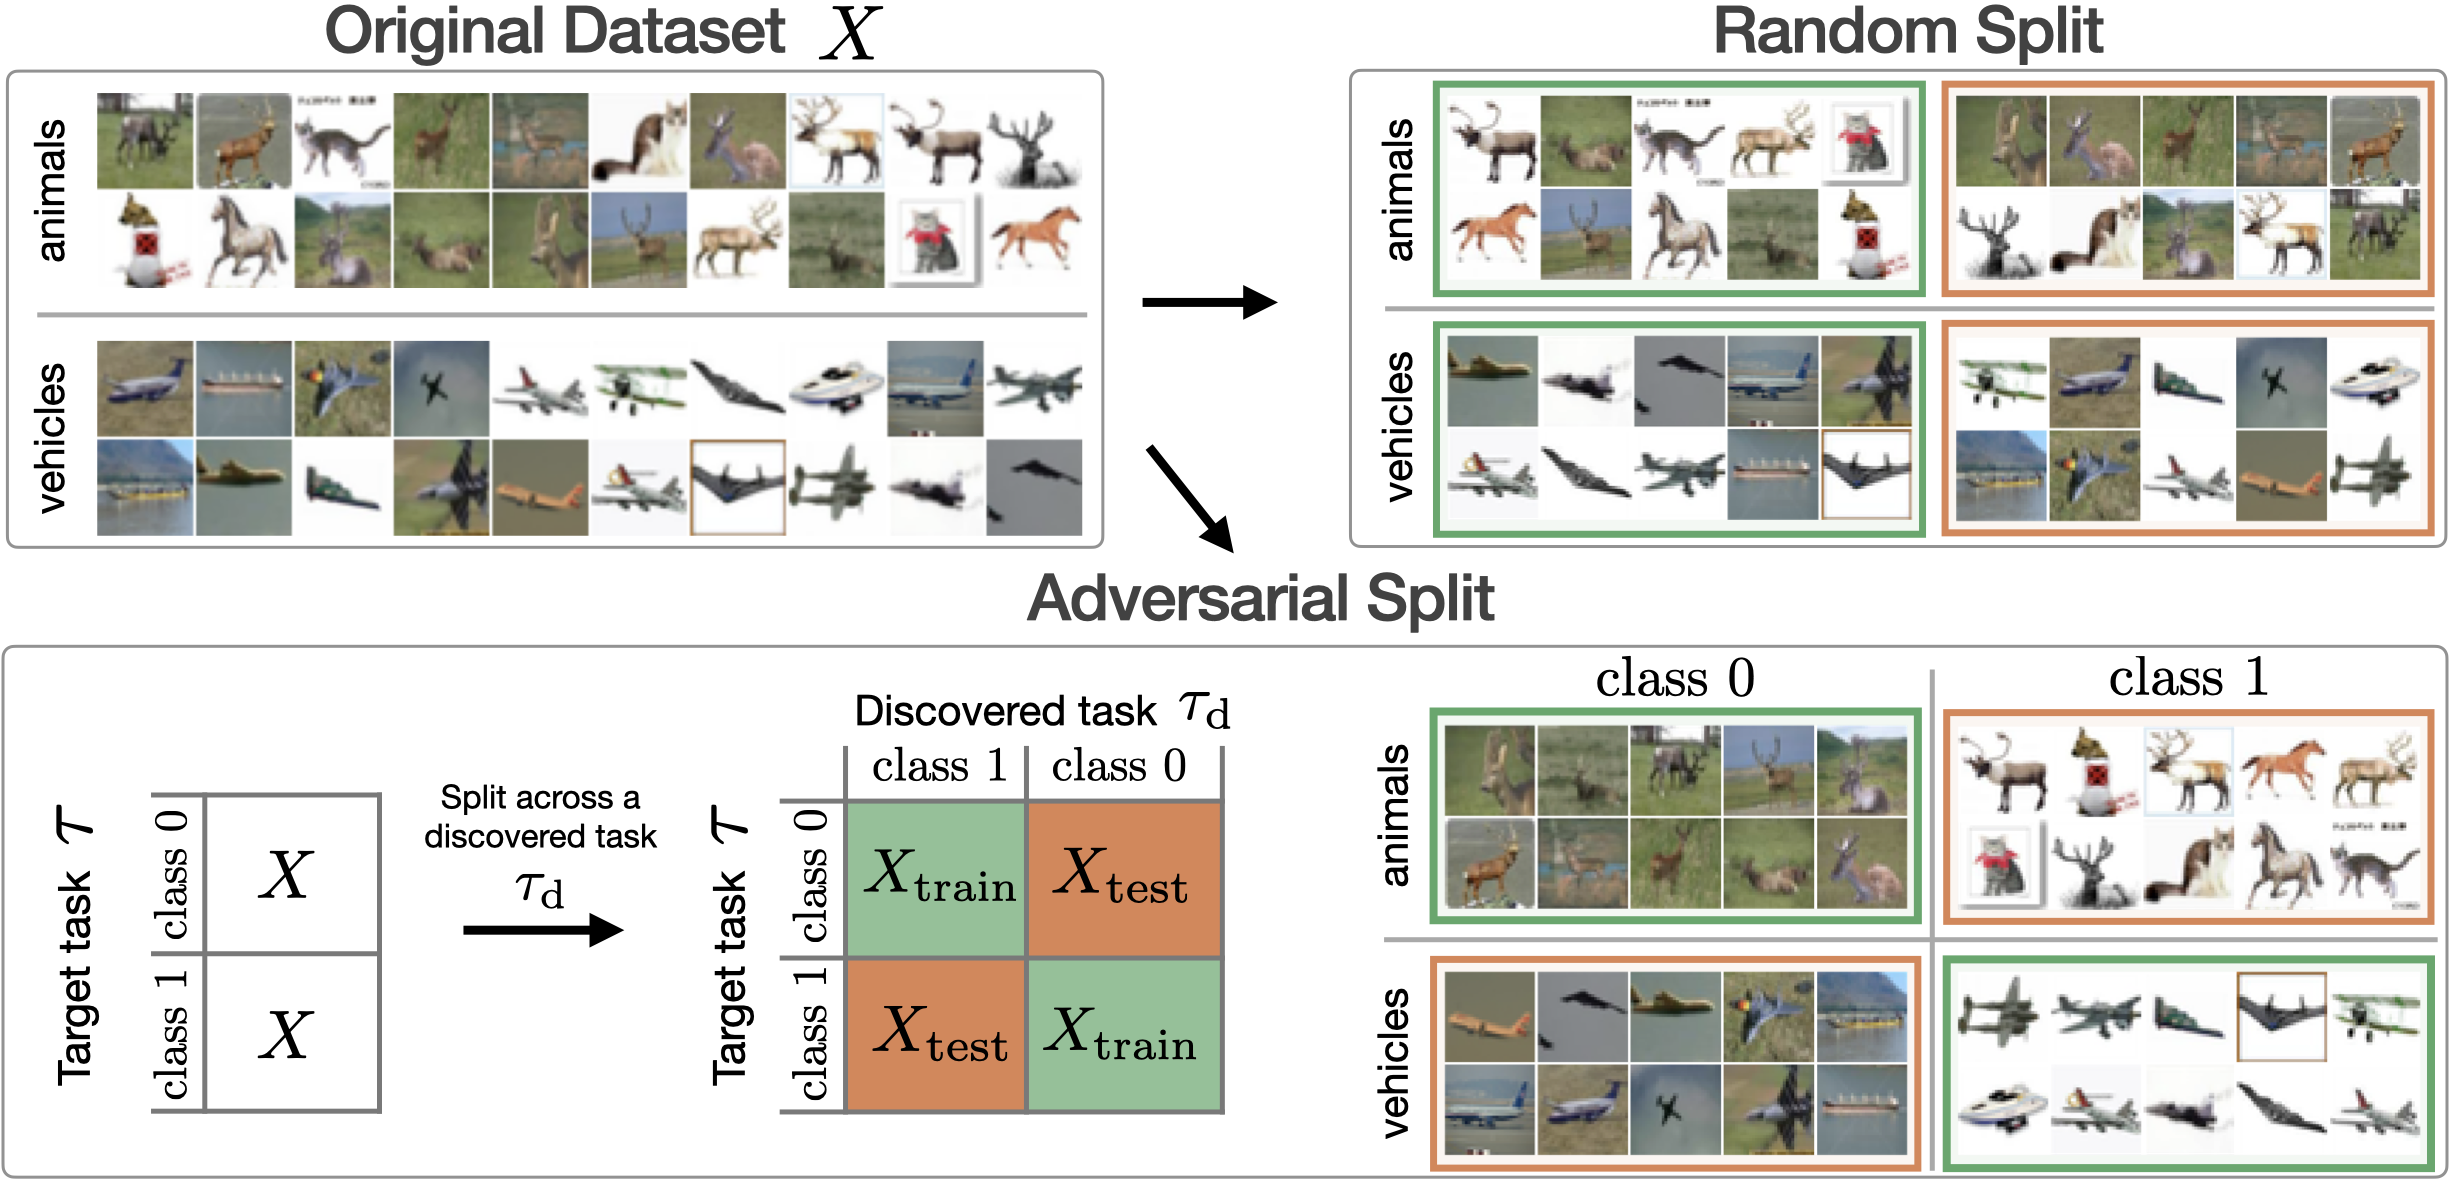

Supplement: Supplementary file 1 [file 64ad7b36b497f375ded2e6f15713ed4c-Supplemental-Conference.zip › supplementary/code/assets/figures/adversarial-split.png]

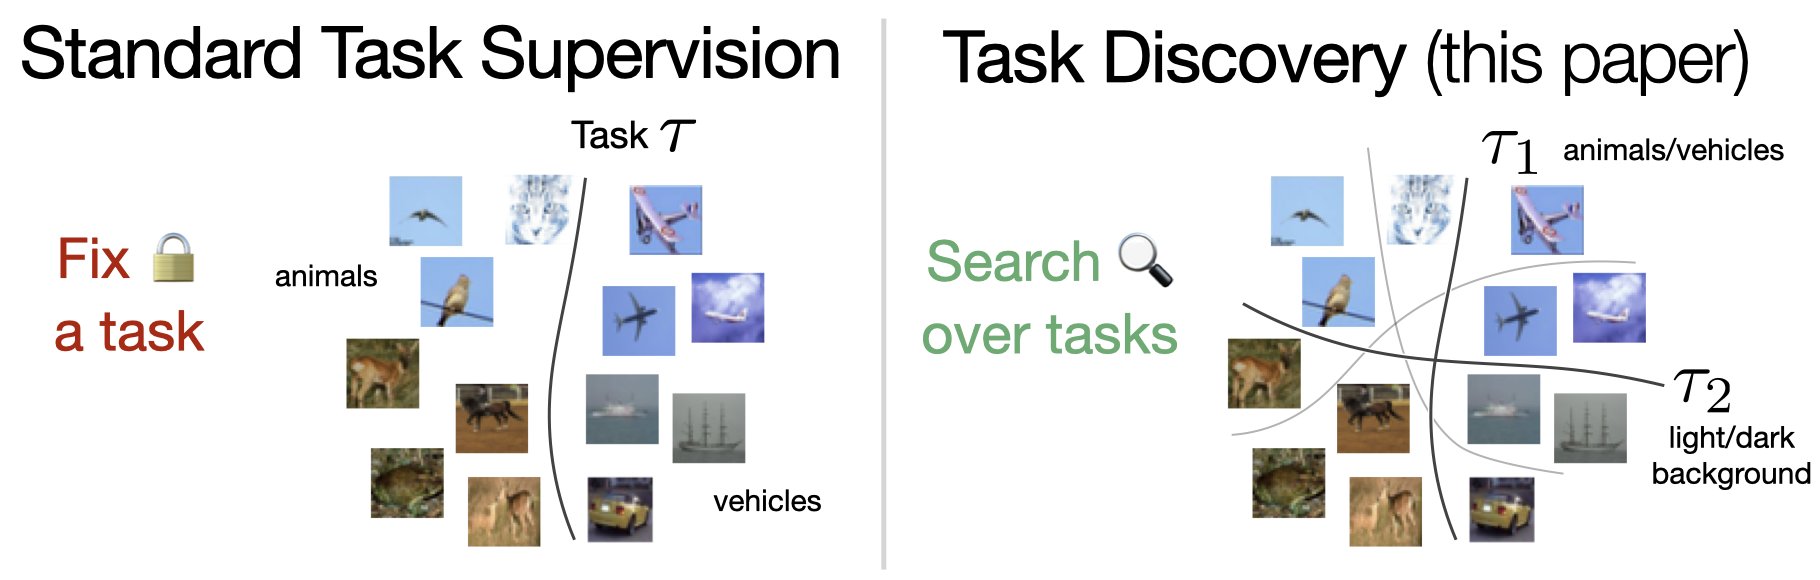

Supplement: Supplementary file 1 [file 64ad7b36b497f375ded2e6f15713ed4c-Supplemental-Conference.zip › supplementary/code/assets/figures/pull-figure.png]

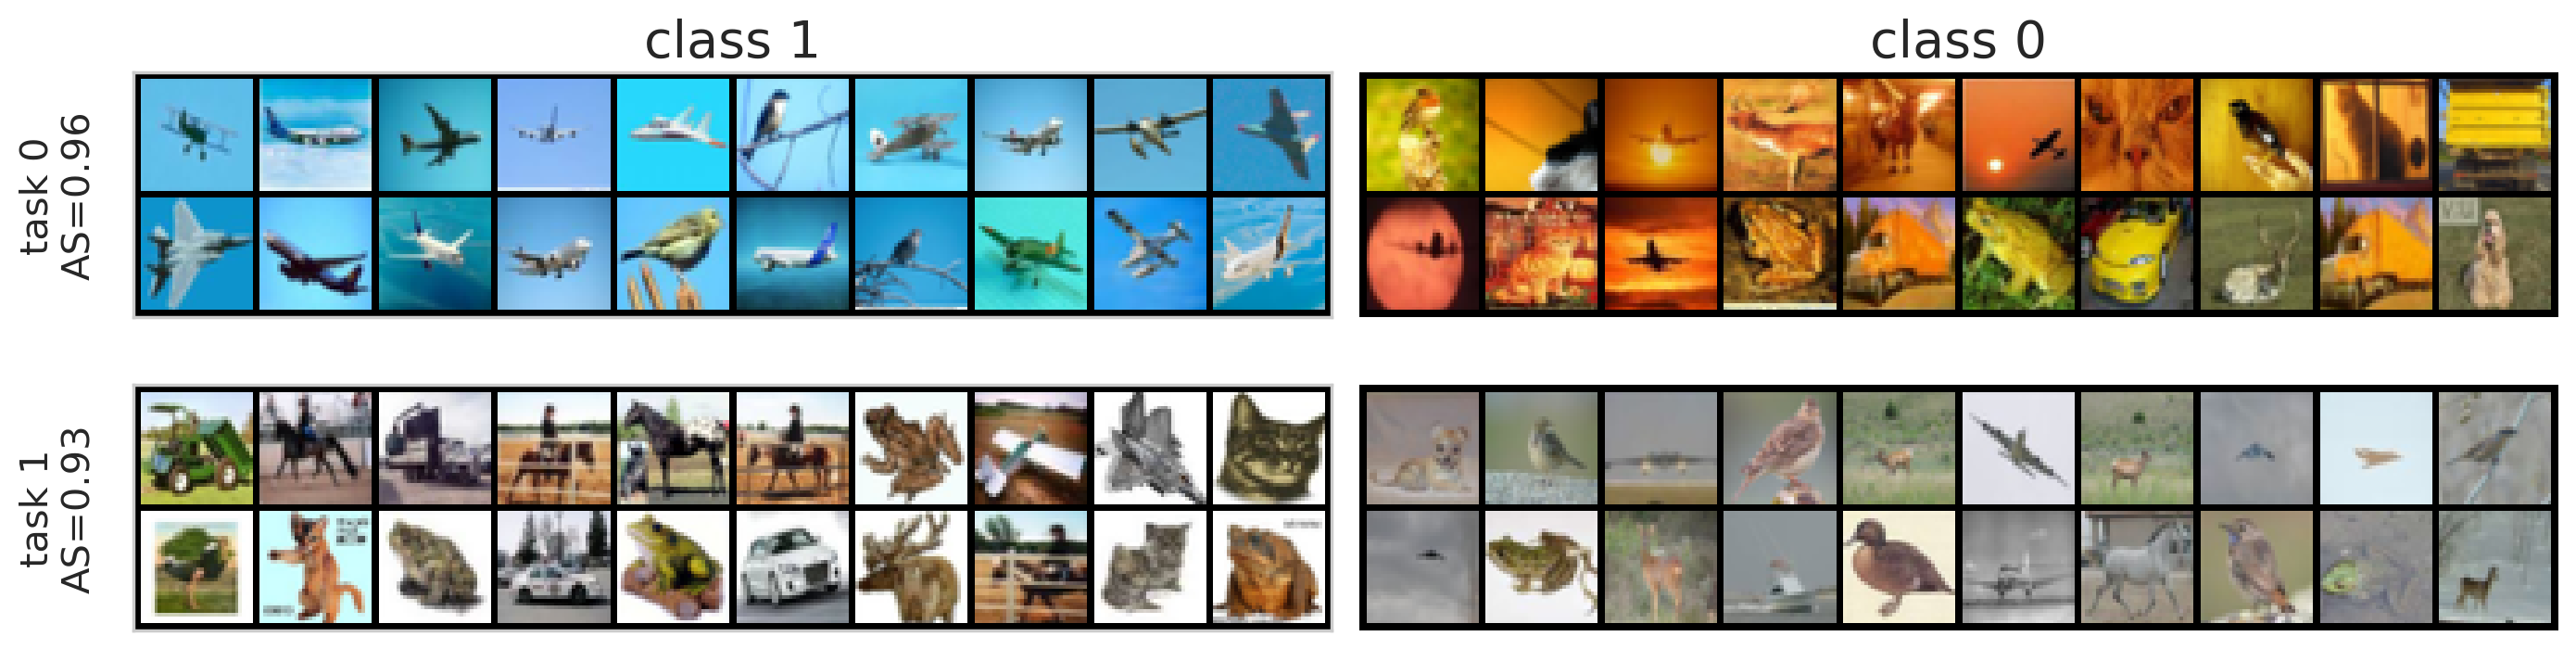

Supplement: Supplementary file 1 [file 64ad7b36b497f375ded2e6f15713ed4c-Supplemental-Conference.zip › supplementary/code/assets/figures/task_viz.png]

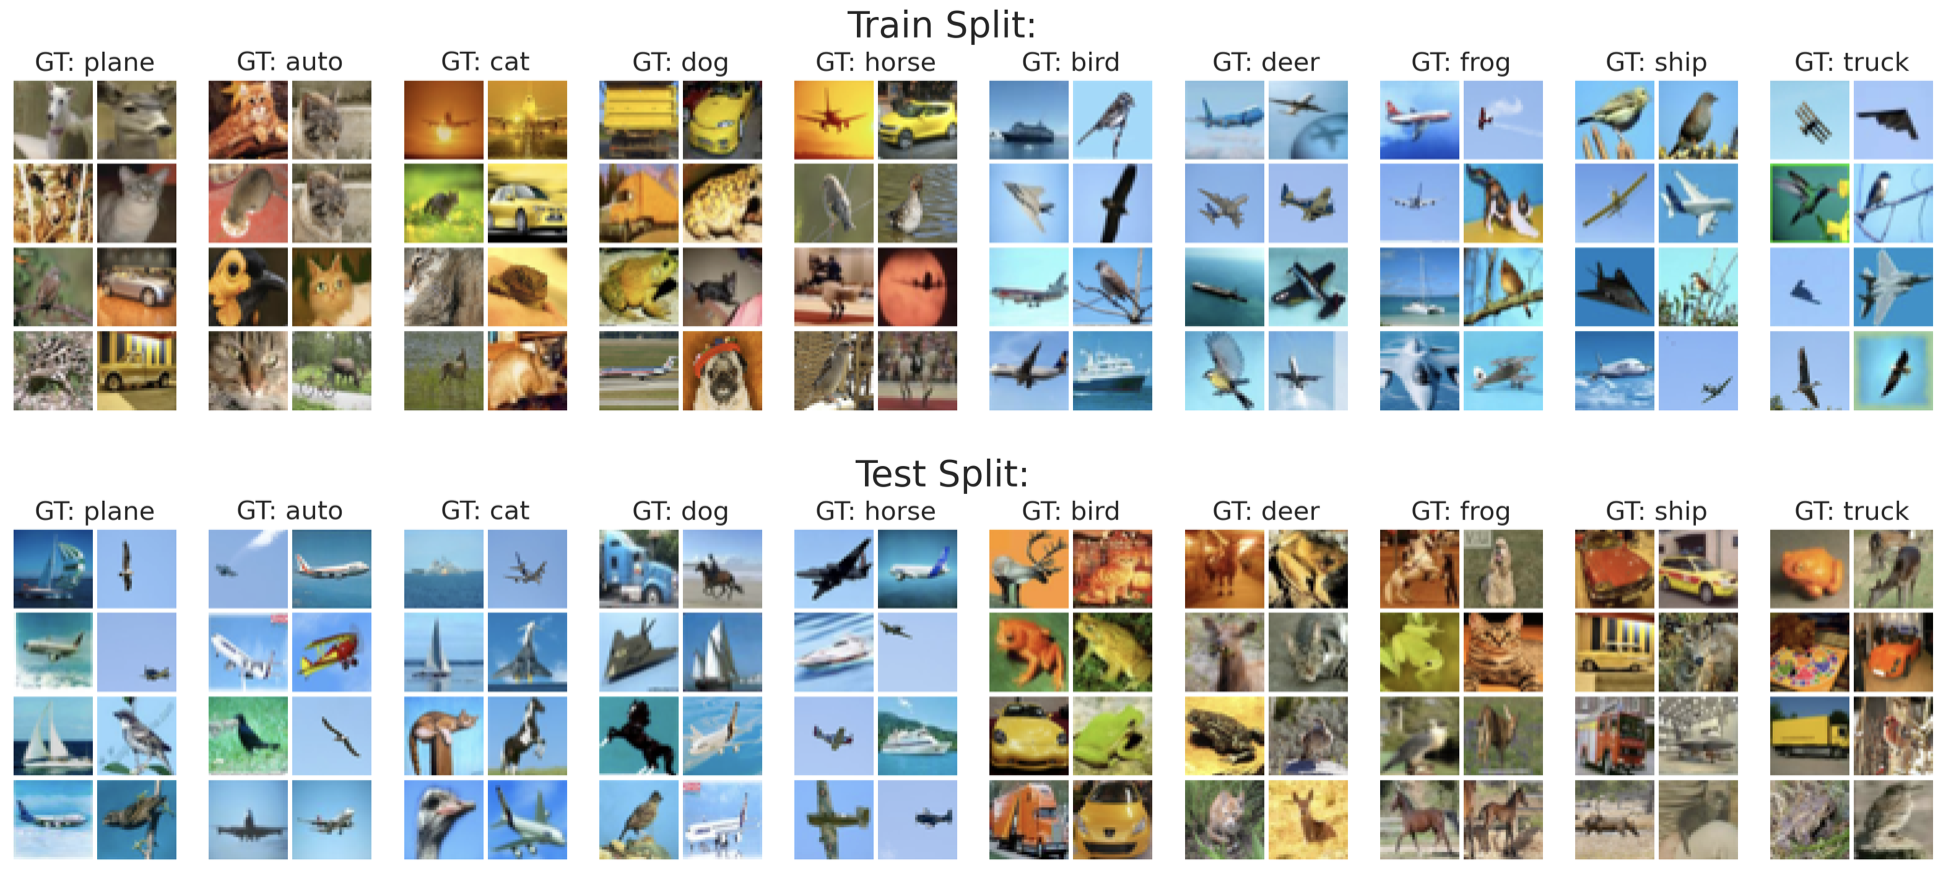

Supplement: Supplementary file 1 [file 64ad7b36b497f375ded2e6f15713ed4c-Supplemental-Conference.zip › supplementary/code/assets/figures/adv_split_viz.png]
